# Supplementary material for: Molecular orbital and topological electron density study of n → π* interactions: amides and thioamides cases
Source: Royal Society of Chemistry journal article supplement (doi:10.1039/d3ra06038a), 2023-01-01
Supplement: d3ra06038a1.pdf [file d3ra06038a1.pdf]

## Supporting Information (SI)

---

### Molecular Orbital and Topological electronic density study of $n \rightarrow \pi^*$ interactions: Amides and Thioamides, cases.

Flor María Briceño-Vargas<sup>a</sup>, Mariana Quesadas-Rojas<sup>b</sup>, Gumersindo Mirón-López<sup>c</sup>, David Cáceres-Castillo<sup>d</sup>, Rubén M. Carballo<sup>d</sup>, Gonzalo J Mena-Rejón<sup>d</sup> and Ramiro F. Quijano-Quiñones.<sup>†,a</sup>

---

<sup>a</sup>Laboratory of Theoretical Chemistry Faculty of Chemistry Autonomous University of Yucatan, Merida, Yucatan, 97069, Mexico.

<sup>b</sup>Escuela Nacional de Educación Superior, UNAM, México.

<sup>c</sup>Laboratory of Nuclear Magnetic Resonance Faculty of Chemistry Autonomous University of Yucatan, Merida, Yucatan, 97069, Mexico.

<sup>d</sup>Laboratory of Pharmaceutical Chemistry Faculty of Chemistry Autonomous University of Yucatan, Merida, Yucatan, 97069, Mexico

† Correspondence Author. Email: ramiro.quijano@correo.uady.mx.

## List of contents

|                                 |          |
|---------------------------------|----------|
| Set B3LYP/6-311+G(2d,p).....    | Page S2  |
| Set B3LYP-D3/6-311+G(2d,p)..... | Page S8  |
| Set WB97X-D4/6-311+G(2d,p)..... | Page S14 |
| Set WB97X-V/6-311+G(2d,p) ..... | Page S20 |
| Set M06-2X/6-311+G(2d,p) .....  | Page S26 |
| Table S1.....                   | Page S32 |
| Figure S1 .....                 | Page S33 |

## Set B3LYP/6-311+G(2d,p)

### Proline 1, *endo*

|   |             |             |             |
|---|-------------|-------------|-------------|
| C | -0.01533718 | -0.01333504 | -0.08711317 |
| H | 1.06982928  | -0.09766223 | -0.12132600 |
| C | -1.48527530 | 1.93353725  | 0.03618745  |
| H | -2.35093918 | 2.16668165  | -0.58578271 |
| H | -1.08597733 | 2.87482787  | 0.43085693  |
| C | -1.83745616 | 0.95869455  | 1.16819762  |
| H | -2.65735704 | 0.31098666  | 0.85403118  |
| H | -2.14154428 | 1.47669101  | 2.07849574  |
| C | -0.55545476 | 0.13327840  | 1.35117698  |
| H | 0.17700042  | 0.68267767  | 1.94770844  |
| H | -0.72535231 | -0.82836424 | 1.83554873  |
| N | -0.45632920 | 1.21715526  | -0.73054054 |
| C | 0.03461057  | 1.55305314  | -1.95808419 |
| O | 0.85607709  | 0.84409779  | -2.52520803 |
| C | -0.48509362 | 2.83605297  | -2.57433294 |
| H | -1.53718982 | 2.72668642  | -2.85159394 |
| H | -0.40869744 | 3.68041730  | -1.88519910 |
| H | 0.09561914  | 3.04253042  | -3.47021137 |
| C | -0.60578814 | -1.24624673 | -0.77324577 |
| O | 0.20345044  | -2.30801355 | -0.61624252 |
| C | -0.25914284 | -3.54032983 | -1.20005172 |
| H | -0.39190535 | -3.41844285 | -2.27452199 |
| H | 0.51783360  | -4.27075463 | -0.98921394 |
| H | -1.20517167 | -3.84256629 | -0.75081091 |
| O | -1.67376018 | -1.28509567 | -1.33045901 |

|   |             |             |            |
|---|-------------|-------------|------------|
| H | 1.07159545  | 2.18944075  | 1.84270219 |
| H | 0.70154026  | 3.19650352  | 0.43282918 |
| C | -1.66589534 | 1.76633268  | 0.60995346 |
| C | -0.6441929  | -1.02424267 | 1.07611354 |
| O | -2.57803211 | 0.99420874  | 0.34234387 |
| O | -0.6822818  | -0.89395076 | 2.27290156 |
| C | -1.92297027 | 3.19384265  | 1.05041462 |
| H | -1.55219257 | 3.90750017  | 0.30955952 |
| H | -2.9968672  | 3.32446479  | 1.15969693 |
| H | -1.43130689 | 3.41340253  | 2.00107286 |
| N | -0.36564934 | 1.36889954  | 0.51775613 |
| O | -1.04466015 | -2.12523354 | 0.41942657 |
| H | -2.49889646 | -2.79414964 | 1.74869544 |
| H | -1.87282259 | -3.96586996 | 0.54828379 |
| H | -0.8864213  | -3.51107106 | 1.97316012 |
| C | -1.61197991 | -3.16597946 | 1.23662442 |

### Proline 1, *exo*

|   |             |             |             |
|---|-------------|-------------|-------------|
| C | -0.05429223 | -0.00024655 | 0.10980482  |
| C | 1.49229867  | -0.04807586 | 0.12476342  |
| C | 1.91330442  | 1.42199368  | -0.01594917 |
| C | 0.83463238  | 2.16941866  | 0.77227484  |
| H | -0.45994176 | -0.19753917 | -0.88415167 |
| H | 1.83721042  | -0.44242623 | 1.08331868  |
| H | 1.88330245  | -0.68792355 | -0.66572048 |
| H | 2.91729413  | 1.61239522  | 0.36558459  |
| H | 1.88515619  | 1.72881255  | -1.06474282 |

### Proline 2, *endo*

|   |             |             |             |
|---|-------------|-------------|-------------|
| C | 0.00000000  | 0.00000000  | 0.00000000  |
| H | 1.08394000  | 0.00000000  | 0.00000000  |
| C | -1.52692807 | 1.91884645  | 0.00000000  |
| H | -2.39902836 | 2.08206040  | -0.63154887 |
| H | -1.15158043 | 2.89515874  | 0.31944096  |
| C | -1.84977246 | 1.02196100  | 1.20174312  |
| H | -2.66330735 | 0.34777706  | 0.94891180  |
| H | -2.13395242 | 1.60409792  | 2.07693035  |
| C | -0.56122891 | 0.21560526  | 1.42063251  |
| H | 0.16113791  | 0.79380651  | 1.99887873  |
| H | -0.73708990 | -0.72215090 | 1.94278869  |
| N | -0.47898683 | 1.18318390  | -0.72302547 |
| C | 0.07435861  | 1.53054998  | -1.91272366 |
| S | 0.97538351  | 0.86574428  | -2.41957561 |
| C | -0.47208271 | 2.77395492  | -2.58424033 |
| H | -1.52206453 | 2.64087041  | -2.84877157 |
| H | -0.40543199 | 3.64476104  | -1.93071219 |
| H | 0.10339619  | 2.95406251  | -3.48626787 |
| C | -0.56979996 | -1.29292801 | -0.61712498 |
| O | 0.29927965  | -2.26820014 | -0.99647519 |
| C | -0.23859102 | -3.54875185 | -1.43956176 |
| H | -0.15046049 | -3.65332577 | -2.52382115 |
| H | 0.31316260  | -4.36219363 | -0.96615096 |
| H | -1.28587945 | -3.60735731 | -1.16589212 |
| O | -1.78782489 | -1.43097546 | -0.68516920 |

### Proline 2, *exo*

|   |             |             |             |
|---|-------------|-------------|-------------|
| C | -0.10828261 | 0.00615451  | 0.10121985  |
| C | 1.43954302  | -0.05843545 | 0.08642343  |
| C | 1.87965595  | 1.40948922  | 0.01622062  |
| C | 0.81075055  | 2.13059058  | 0.83557829  |
| H | -0.54098767 | -0.17848337 | -0.88282571 |
| H | 1.80065931  | -0.51020045 | 1.01290392  |
| H | 1.80422918  | -0.65924597 | -0.74575639 |
| H | 2.88402935  | 1.56948739  | 0.41027989  |
| H | 1.85907797  | 1.76839656  | -1.0159438  |
| H | 1.02394726  | 2.07055861  | 1.90894094  |
| H | 0.70346383  | 3.17869467  | 0.56460999  |
| C | -1.66878159 | 1.85788205  | 0.55625748  |
| C | -0.67387528 | -1.02169873 | 1.07947253  |
| S | -2.99431581 | 0.94712976  | 0.10882853  |
| O | -0.73356440 | -0.86678150 | 2.27244989  |
| C | -1.82783368 | 3.28504833  | 1.02270724  |
| H | -1.35685228 | 3.98171428  | 0.32173990  |
| H | -2.88432832 | 3.52511228  | 1.08922899  |
| H | -1.36432842 | 3.43514360  | 2.00227741  |
| N | -0.41415091 | 1.37711862  | 0.52179405  |
| O | -0.98627062 | -2.16008820 | 0.44157404  |
| H | -2.42694743 | -2.89796171 | 1.74853239  |
| H | -1.68257737 | -4.05225945 | 0.59995202  |
| H | -0.77375144 | -3.48900539 | 2.03790885  |
| C | -1.50057704 | -3.21785322 | 1.27234203  |

### Proline 3, *endo*

|   |             |             |             |
|---|-------------|-------------|-------------|
| C | 0.05750000  | 0.45230000  | 0.71050000  |
| H | -0.19320000 | -0.12300000 | 1.59430000  |
| C | 2.27590000  | 0.95470000  | -0.20590000 |
| H | 2.61100000  | 0.86580000  | -1.23830000 |
| H | 3.15090000  | 0.86460000  | 0.44400000  |
| C | 1.52680000  | 2.27010000  | 0.04190000  |
| H | 1.04950000  | 2.59970000  | -0.87670000 |
| H | 2.19340000  | 3.05580000  | 0.39390000  |
| C | 0.45370000  | 1.89780000  | 1.07550000  |
| H | 0.87180000  | 1.90280000  | 2.08330000  |
| H | -0.39630000 | 2.57620000  | 1.06030000  |
| N | 1.28950000  | -0.08510000 | 0.12270000  |
| C | 1.45160000  | -1.42460000 | -0.02460000 |
| O | 0.57670000  | -2.21790000 | 0.31590000  |
| C | 2.75980000  | -1.89300000 | -0.62860000 |
| H | 2.86270000  | -1.53450000 | -1.65380000 |
| H | 3.61700000  | -1.52430000 | -0.06370000 |
| H | 2.76570000  | -2.97800000 | -0.62740000 |
| C | -1.09220000 | 0.44870000  | -0.31680000 |
| N | -2.25640000 | -0.17170000 | 0.01500000  |
| C | -3.39450000 | -0.04940000 | -0.88790000 |
| H | -3.55990000 | -0.98170000 | -1.43360000 |
| H | -4.29390000 | 0.18230000  | -0.31550000 |
| H | -3.19830000 | 0.74360000  | -1.60050000 |
| C | -2.42230000 | -1.08650000 | 1.14430000  |
| H | -3.20820000 | -1.79600000 | 0.89190000  |
| H | -1.51360000 | -1.65540000 | 1.31510000  |
| H | -2.72310000 | -0.56290000 | 2.05530000  |
| O | -0.94740000 | 1.06070000  | -1.37120000 |

### Proline 3, *exo*

|   |             |             |             |
|---|-------------|-------------|-------------|
| C | 0.09900000  | -0.65180000 | -0.49790000 |
| C | 0.56890000  | -2.12220000 | -0.40410000 |
| C | 2.10240000  | -2.04070000 | -0.40610000 |
| C | 2.38040000  | -0.74400000 | 0.35590000  |
| H | -0.13750000 | -0.37530000 | -1.52130000 |
| H | 0.22190000  | -2.54550000 | 0.53670000  |
| H | 0.17320000  | -2.72390000 | -1.21980000 |
| H | 2.57020000  | -2.90630000 | 0.05990000  |
| H | 2.48330000  | -1.95780000 | -1.42530000 |
| H | 2.35050000  | -0.91000000 | 1.43630000  |
| H | 3.34030000  | -0.30200000 | 0.10000000  |
| C | 1.24850000  | 1.47450000  | -0.09790000 |
| C | -1.08890000 | -0.40290000 | 0.45210000  |
| O | 0.26410000  | 2.08050000  | -0.51470000 |
| O | -0.92910000 | -0.59170000 | 1.65250000  |
| C | 2.48130000  | 2.20530000  | 0.39550000  |
| H | 3.33780000  | 2.01420000  | -0.25320000 |
| H | 2.26620000  | 3.26890000  | 0.39040000  |
| H | 2.75190000  | 1.89370000  | 1.40460000  |
| C | -3.40990000 | 0.17910000  | 0.81060000  |
| H | -3.19950000 | -0.29240000 | 1.76390000  |
| H | -3.56630000 | 1.24840000  | 0.97530000  |
| H | -4.31710000 | -0.24640000 | 0.38140000  |
| N | 1.27440000  | 0.11850000  | -0.06580000 |
| N | -2.28590000 | -0.05170000 | -0.08990000 |
| C | -2.44230000 | 0.41160000  | -1.47030000 |
| H | -2.27570000 | -0.39120000 | -2.18930000 |
| H | -3.46590000 | 0.75400000  | -1.59690000 |
| H | -1.76890000 | 1.24110000  | -1.68150000 |

### Proline 4, *endo*

|   |             |             |             |
|---|-------------|-------------|-------------|
| C | 0.07840000  | 0.55070000  | -0.66830000 |
| H | 0.24770000  | -0.10980000 | -1.51060000 |
| C | -1.99180000 | 1.51570000  | 0.19280000  |
| H | -2.33340000 | 1.49520000  | 1.22580000  |
| H | -2.86610000 | 1.60930000  | -0.45580000 |
| C | -0.97910000 | 2.63810000  | -0.05820000 |
| H | -0.45440000 | 2.87120000  | 0.86510000  |
| H | -1.45930000 | 3.54470000  | -0.42200000 |
| C | -0.00390000 | 2.03390000  | -1.07800000 |
| H | -0.40940000 | 2.10330000  | -2.08850000 |
| H | 0.96910000  | 2.52100000  | -1.07270000 |
| N | -1.25840000 | 0.27780000  | -0.13610000 |
| C | -1.72690000 | -0.96530000 | 0.03230000  |
| C | -3.12150000 | -1.07670000 | 0.59510000  |
| H | -3.14960000 | -0.69180000 | 1.61700000  |
| H | -3.83700000 | -0.49760000 | 0.00750000  |
| H | -3.42710000 | -2.11580000 | 0.60530000  |
| C | 1.13760000  | 0.33740000  | 0.43350000  |
| N | 2.36240000  | -0.11840000 | 0.05010000  |
| C | 3.35860000  | -0.38700000 | 1.08110000  |
| H | 3.46200000  | -1.46210000 | 1.24870000  |
| H | 4.32540000  | 0.01490000  | 0.77650000  |
| H | 3.04210000  | 0.08350000  | 2.00500000  |
| C | 2.65050000  | -0.64400000 | -1.28190000 |
| H | 3.72710000  | -0.76890000 | -1.37190000 |
| H | 2.17050000  | -1.61070000 | -1.44900000 |
| H | 2.33990000  | 0.04730000  | -2.06220000 |
| O | 0.87390000  | 0.65280000  | 1.58730000  |
| S | -0.84230000 | -2.33680000 | -0.34410000 |

### Proline 4, *exo*

|   |             |             |             |
|---|-------------|-------------|-------------|
| C | 0.00460000  | 0.72560000  | -0.49470000 |
| C | -0.22360000 | 2.25710000  | -0.53500000 |
| C | -1.74830000 | 2.42790000  | -0.48080000 |
| C | -2.19790000 | 1.24870000  | 0.37900000  |
| H | 0.20040000  | 0.31230000  | -1.47930000 |
| H | 0.23040000  | 2.71480000  | 0.34250000  |
| H | 0.22280000  | 2.70540000  | -1.42020000 |
| H | -2.04950000 | 3.38590000  | -0.06080000 |
| H | -2.18310000 | 2.34390000  | -1.47780000 |
| H | -2.06960000 | 1.46200000  | 1.44330000  |
| H | -3.22990000 | 0.96240000  | 0.20160000  |
| C | -1.52910000 | -1.13680000 | 0.00540000  |
| C | 1.12510000  | 0.38470000  | 0.50850000  |
| O | 0.88330000  | 0.46830000  | 1.70550000  |
| C | -2.87300000 | -1.55300000 | 0.55240000  |
| H | -3.68330000 | -1.20180000 | -0.09070000 |
| H | -2.91970000 | -2.63390000 | 0.60530000  |
| H | -3.03610000 | -1.13800000 | 1.54880000  |
| C | 3.41440000  | -0.25710000 | 0.95820000  |
| H | 3.11980000  | 0.05610000  | 1.95330000  |
| H | 3.56770000  | -1.33950000 | 0.96050000  |
| H | 4.34910000  | 0.23000000  | 0.68020000  |
| N | -1.27630000 | 0.17700000  | -0.02620000 |
| N | 2.36530000  | 0.11580000  | 0.01580000  |
| C | 2.63220000  | -0.16040000 | -1.39300000 |
| H | 2.25400000  | 0.63230000  | -2.03530000 |
| H | 3.70980000  | -0.20180000 | -1.53260000 |
| H | 2.19840000  | -1.11290000 | -1.70400000 |
| S | -0.43730000 | -2.28710000 | -0.53170000 |

### Proline 5, *endo*

|   |             |             |             |
|---|-------------|-------------|-------------|
| C | -0.13730000 | -0.25180000 | 0.85190000  |
| H | 0.05490000  | 0.46110000  | 1.64580000  |
| C | -2.34560000 | -0.94540000 | 0.03310000  |
| H | -2.64400000 | -1.06600000 | -1.00750000 |
| H | -3.24110000 | -0.73160000 | 0.62240000  |
| C | -1.60940000 | -2.18650000 | 0.55640000  |
| H | -1.17450000 | -2.73170000 | -0.27560000 |
| H | -2.27830000 | -2.85350000 | 1.09800000  |
| C | -0.49340000 | -1.62950000 | 1.45490000  |
| H | -0.86130000 | -1.47490000 | 2.47020000  |
| H | 0.36770000  | -2.29120000 | 1.50610000  |
| N | -1.37280000 | 0.14670000  | 0.17730000  |
| C | -1.55510000 | 1.44150000  | -0.18760000 |
| C | -2.85900000 | 1.78180000  | -0.87760000 |
| H | -2.93420000 | 1.26050000  | -1.83300000 |
| H | -3.72050000 | 1.49130000  | -0.27500000 |
| H | -2.88360000 | 2.85260000  | -1.05130000 |
| C | 1.06710000  | -0.30640000 | -0.10300000 |
| N | 2.16980000  | 0.36580000  | 0.26490000  |
| C | 3.38940000  | 0.25430000  | -0.53440000 |
| H | 3.32360000  | 0.87060000  | -1.43350000 |
| H | 4.23270000  | 0.58010000  | 0.06890000  |
| H | 3.53140000  | -0.77540000 | -0.84840000 |
| C | 2.18600000  | 1.37570000  | 1.33610000  |
| H | 3.07930000  | 1.98030000  | 1.21540000  |
| H | 1.31910000  | 2.02640000  | 1.25290000  |
| H | 2.22110000  | 0.91460000  | 2.32450000  |
| S | 0.98410000  | -1.22850000 | -1.49980000 |
| O | -0.69660000 | 2.29420000  | 0.03030000  |

### Proline 5, *exo*

|   |             |             |             |
|---|-------------|-------------|-------------|
| C | 0.17120000  | -0.45780000 | -0.72730000 |
| C | 0.58890000  | -1.92910000 | -0.97650000 |
| C | 2.12130000  | -1.92430000 | -0.86620000 |
| C | 2.39110000  | -0.85130000 | 0.19060000  |
| H | 0.01110000  | 0.05120000  | -1.67280000 |
| H | 0.16190000  | -2.55770000 | -0.19910000 |
| H | 0.23370000  | -2.28330000 | -1.94260000 |
| H | 2.52170000  | -2.89660000 | -0.58420000 |
| H | 2.57800000  | -1.63200000 | -1.81310000 |
| H | 2.26810000  | -1.25360000 | 1.19910000  |
| H | 3.38260000  | -0.41420000 | 0.10540000  |
| C | 1.41250000  | 1.48320000  | 0.09890000  |
| C | -1.08170000 | -0.34660000 | 0.15660000  |
| C | 2.64990000  | 2.03480000  | 0.77760000  |
| H | 3.52770000  | 1.92510000  | 0.13850000  |
| H | 2.48570000  | 3.09020000  | 0.96910000  |
| H | 2.85380000  | 1.52050000  | 1.71660000  |
| C | -3.41740000 | 0.26350000  | 0.38550000  |
| H | -3.56290000 | -0.67380000 | 0.91440000  |
| H | -3.37860000 | 1.06260000  | 1.12850000  |
| H | -4.24530000 | 0.43980000  | -0.29590000 |
| N | 1.35240000  | 0.14170000  | -0.09210000 |
| N | -2.17600000 | 0.20870000  | -0.38540000 |
| C | -2.16050000 | 0.95040000  | -1.65620000 |
| H | -2.08570000 | 0.27920000  | -2.51290000 |
| H | -3.09390000 | 1.49770000  | -1.73980000 |
| H | -1.33990000 | 1.66390000  | -1.66280000 |
| S | -1.03700000 | -0.95990000 | 1.71500000  |
| O | 0.49840000  | 2.21880000  | -0.26800000 |

### Proline 6, *endo*

|   |             |             |             |
|---|-------------|-------------|-------------|
| C | 0.00470000  | 0.39470000  | -0.81910000 |
| H | 0.10100000  | -0.37250000 | -1.57840000 |
| C | -2.03640000 | 1.52050000  | -0.07860000 |
| H | -2.33310000 | 1.68230000  | 0.95580000  |
| H | -2.93620000 | 1.50170000  | -0.69740000 |
| C | -1.03950000 | 2.57990000  | -0.56020000 |
| H | -0.51670000 | 3.00450000  | 0.29200000  |
| H | -1.53580000 | 3.38550000  | -1.09860000 |
| C | -0.05630000 | 1.80390000  | -1.44870000 |
| H | -0.44280000 | 1.71560000  | -2.46500000 |
| H | 0.92280000  | 2.27470000  | -1.50120000 |
| N | -1.31830000 | 0.23800000  | -0.21340000 |
| C | -1.82190000 | -0.96120000 | 0.10720000  |
| C | -3.19930000 | -0.95820000 | 0.71960000  |
| H | -3.18970000 | -0.42140000 | 1.67090000  |
| H | -3.92270000 | -0.46010000 | 0.07040000  |
| H | -3.52230000 | -1.97720000 | 0.89390000  |
| C | 1.14340000  | 0.26290000  | 0.20410000  |
| N | 2.27040000  | -0.32680000 | -0.22850000 |
| C | 3.41650000  | -0.43030000 | 0.67520000  |
| H | 3.20400000  | -1.12330000 | 1.49080000  |
| H | 4.27740000  | -0.77920000 | 0.11290000  |
| H | 3.63050000  | 0.54010000  | 1.11660000  |
| C | 2.35760000  | -1.03390000 | -1.51360000 |
| H | 3.34150000  | -1.48310000 | -1.59280000 |
| H | 1.60870000  | -1.82470000 | -1.56690000 |
| H | 2.23130000  | -0.35360000 | -2.35560000 |
| S | -0.99770000 | -2.39930000 | -0.13480000 |
| S | 0.98540000  | 0.91450000  | 1.73680000  |

### Proline 6, *exo*

|   |             |             |             |
|---|-------------|-------------|-------------|
| C | 0.04910000  | -0.60110000 | -0.68020000 |
| C | 0.22440000  | -2.11930000 | -0.94260000 |
| C | 1.73870000  | -2.35730000 | -0.86200000 |
| C | 2.19720000  | -1.33690000 | 0.17820000  |
| H | -0.06530000 | -0.05490000 | -1.61140000 |
| H | -0.28370000 | -2.68100000 | -0.16200000 |
| H | -0.19960000 | -2.40600000 | -1.90320000 |
| H | 1.98680000  | -3.37820000 | -0.57720000 |
| H | 2.21610000  | -2.14760000 | -1.82010000 |
| H | 2.01920000  | -1.69600000 | 1.19420000  |
| H | 3.24380000  | -1.06870000 | 0.07620000  |
| C | 1.65760000  | 1.10730000  | 0.07180000  |
| C | -1.13980000 | -0.33130000 | 0.25360000  |
| C | 2.99140000  | 1.38590000  | 0.72080000  |
| H | 3.81460000  | 1.06460000  | 0.07830000  |
| H | 3.08950000  | 2.45020000  | 0.89730000  |
| H | 3.08230000  | 0.85380000  | 1.66950000  |
| C | -3.45140000 | 0.33070000  | 0.52850000  |
| H | -3.62750000 | -0.53770000 | 1.15860000  |
| H | -3.29730000 | 1.18900000  | 1.18420000  |
| H | -4.31200000 | 0.50710000  | -0.10980000 |
| N | 1.33000000  | -0.17980000 | -0.09360000 |
| N | -2.27510000 | 0.10570000  | -0.31210000 |
| C | -2.35330000 | 0.53750000  | -1.71330000 |
| H | -2.15190000 | -0.28700000 | -2.39690000 |
| H | -3.35940000 | 0.89280000  | -1.90800000 |
| H | -1.65180000 | 1.35080000  | -1.90130000 |
| S | 0.66700000  | 2.37170000  | -0.40260000 |
| S | -1.00260000 | -0.69830000 | 1.88030000  |

## Set B3LYP D3/6-311+G(2d,p)

### Proline 1, *endo*

|   |             |             |             |
|---|-------------|-------------|-------------|
| C | 0.01063442  | -0.00073022 | -0.05152441 |
| H | 1.09454446  | -0.09598049 | -0.06979033 |
| C | -1.46780844 | 1.93550658  | 0.04502352  |
| H | -2.31844535 | 2.15817055  | -0.59980065 |
| H | -1.08863127 | 2.87978645  | 0.45049105  |
| C | -1.83860723 | 0.95382106  | 1.16368868  |
| H | -2.64183427 | 0.29912783  | 0.82402316  |
| H | -2.17006814 | 1.46439672  | 2.06799251  |
| C | -0.55510501 | 0.13983317  | 1.37394627  |
| H | 0.16113876  | 0.69513282  | 1.98367973  |
| H | -0.72703000 | -0.82427755 | 1.85168229  |
| N | -0.41250883 | 1.23314914  | -0.69458487 |
| C | 0.03858631  | 1.52151791  | -1.94663402 |
| O | 0.83945115  | 0.78808239  | -2.51193748 |
| C | -0.49935951 | 2.78190557  | -2.58749678 |
| H | -1.55006782 | 2.64595278  | -2.85777271 |
| H | -0.43668584 | 3.64000768  | -1.91483595 |
| H | 0.07381307  | 2.97901108  | -3.48999112 |
| C | -0.58818083 | -1.21400487 | -0.75636623 |
| O | 0.20866620  | -2.28569646 | -0.62089492 |
| C | -0.27040142 | -3.49654438 | -1.23370300 |
| H | -0.40297791 | -3.34437794 | -2.30418143 |
| H | 0.49674398  | -4.24211660 | -1.04235675 |
| H | -1.22021359 | -3.79552663 | -0.79072110 |
| O | -1.65900420 | -1.22958928 | -1.30967023 |

### Proline 1, *exo*

|   |             |             |             |
|---|-------------|-------------|-------------|
| C | -0.03585518 | -0.00243046 | 0.08159938  |
| C | 1.50787917  | -0.04176563 | 0.12529484  |
| C | 1.92117861  | 1.42892527  | -0.01692428 |
| C | 0.82799354  | 2.17026803  | 0.75377285  |
| H | -0.42535137 | -0.21173377 | -0.91562181 |
| H | 1.83325667  | -0.42538930 | 1.09446154  |
| H | 1.91739997  | -0.68537408 | -0.65186986 |
| H | 2.91867448  | 1.62798842  | 0.37559895  |
| H | 1.90084181  | 1.73087766  | -1.06692439 |
| H | 1.04453012  | 2.18669563  | 1.82819775  |
| H | 0.69525812  | 3.19695365  | 0.41413825  |
| C | -1.66258580 | 1.73343093  | 0.61075461  |
| C | -0.63464158 | -1.00912265 | 1.05448687  |
| O | -2.56646581 | 0.94488593  | 0.36406849  |
| O | -0.66383987 | -0.86447565 | 2.24997421  |
| C | -1.92683546 | 3.15033913  | 1.07216321  |
| H | -1.56139737 | 3.87639556  | 0.34135316  |
| H | -3.00018118 | 3.27403809  | 1.19111871  |
| H | -1.42861974 | 3.35411317  | 2.02285794  |
| N | -0.36021136 | 1.36513293  | 0.47478747  |
| O | -1.05204777 | -2.10970883 | 0.41153860  |
| H | -2.51585658 | -2.72917242 | 1.75043120  |
| H | -1.91183906 | -3.93271953 | 0.56977936  |
| H | -0.91678359 | -3.47101709 | 1.98698033  |
| C | -1.63656921 | -3.12662795 | 1.24469902  |



### Proline 2, *endo*

|   |             |             |             |
|---|-------------|-------------|-------------|
| C | -0.00230523 | -0.00997116 | -0.07817482 |
| H | 1.08198146  | -0.09051382 | -0.11302520 |
| C | -1.48926353 | 1.91548057  | 0.01058729  |
| H | -2.34156465 | 2.13851266  | -0.63046534 |
| H | -1.09620447 | 2.85982488  | 0.40098881  |
| C | -1.84725729 | 0.94514123  | 1.13877567  |
| H | -2.64639203 | 0.27974496  | 0.81077788  |
| H | -2.17855304 | 1.46528453  | 2.03756069  |
| C | -0.55505250 | 0.14833344  | 1.34944868  |
| H | 0.16135516  | 0.71959512  | 1.94413755  |
| H | -0.71134554 | -0.81092855 | 1.84150039  |
| N | -0.44109364 | 1.20938081  | -0.74701146 |
| C | 0.03218400  | 1.57578430  | -1.94751358 |
| S | 1.15413288  | 0.66997017  | -2.78621506 |
| C | -0.52109727 | 2.85940574  | -2.50830010 |
| H | -1.58055587 | 2.73717589  | -2.75425656 |
| H | -0.44262433 | 3.67827872  | -1.78743538 |
| H | 0.01706386  | 3.12267540  | -3.41308604 |
| C | -0.59965201 | -1.23812837 | -0.75902063 |
| O | 0.19204420  | -2.30599121 | -0.58835140 |
| C | -0.28130798 | -3.52978105 | -1.17956380 |
| H | -0.39665000 | -3.40056521 | -2.25506865 |
| H | 0.48144656  | -4.27196109 | -0.96004708 |
| H | -1.23821093 | -3.81650072 | -0.74397653 |
| O | -1.67442906 | -1.26368993 | -1.30400007 |

### Proline 2, *exo*

|   |             |             |             |
|---|-------------|-------------|-------------|
| C | -0.08132024 | 0.00422931  | 0.08738154  |
| C | 1.46312962  | -0.04995729 | 0.09956095  |
| C | 1.88943489  | 1.41923072  | 0.00662183  |
| C | 0.81179674  | 2.13991651  | 0.81225392  |
| H | -0.49929565 | -0.18566790 | -0.90156258 |
| H | 1.80741932  | -0.47645560 | 1.04382334  |
| H | 1.84702980  | -0.66611736 | -0.71175703 |
| H | 2.89112578  | 1.59599243  | 0.39890642  |
| H | 1.86359852  | 1.76110973  | -1.03083714 |
| H | 1.01933641  | 2.09358769  | 1.88698464  |
| H | 0.69385700  | 3.18301124  | 0.52769997  |
| C | -1.66150610 | 1.82000730  | 0.57076836  |
| C | -0.65741505 | -1.01252534 | 1.06449693  |
| S | -2.97104177 | 0.87326213  | 0.15910211  |
| O | -0.70720248 | -0.85215727 | 2.25729064  |
| C | -1.83771978 | 3.24045494  | 1.04219408  |
| H | -1.38536562 | 3.94463064  | 0.33712063  |
| H | -2.89639747 | 3.46361454  | 1.12521569  |
| H | -1.36095078 | 3.39165509  | 2.01492543  |
| N | -0.40002115 | 1.37051635  | 0.50214906  |
| O | -0.98958476 | -2.14625959 | 0.43128776  |
| H | -2.46133187 | -2.82557507 | 1.72979085  |
| H | -1.73984104 | -4.01570823 | 0.60254658  |
| H | -0.82935089 | -3.46083109 | 2.04353379  |
| C | -1.54045183 | -3.17945685 | 1.26721861  |

### Proline 3, *endo*

|   |             |             |             |
|---|-------------|-------------|-------------|
| C | 0.05622775  | 0.46173389  | 0.73133664  |
| H | -0.19941277 | -0.11169032 | 1.61702959  |
| C | 2.26094855  | 0.94941434  | -0.21350006 |
| H | 2.57496363  | 0.85038964  | -1.25347493 |
| H | 3.14892852  | 0.86052923  | 0.42166207  |
| C | 1.51927411  | 2.26737576  | 0.03772291  |
| H | 1.02512768  | 2.58895676  | -0.87652109 |
| H | 2.19396234  | 3.05537231  | 0.37425661  |
| C | 0.46158859  | 1.90348621  | 1.08890175  |
| H | 0.89597896  | 1.90716172  | 2.09173674  |
| H | -0.38840917 | 2.58489985  | 1.08351704  |
| N | 1.28046155  | -0.08381053 | 0.14223987  |
| C | 1.43293531  | -1.42220951 | -0.00422921 |
| O | 0.56131027  | -2.21191309 | 0.35294199  |
| C | 2.72937416  | -1.89076933 | -0.62930782 |
| H | 2.81259808  | -1.53112538 | -1.65786514 |
| H | 3.59561323  | -1.51666388 | -0.07845765 |
| H | 2.73783737  | -2.97768008 | -0.62642954 |
| C | -1.08192510 | 0.46245600  | -0.30266619 |
| N | -2.24080300 | -0.17110238 | 0.01201506  |
| C | -3.36904659 | -0.05699162 | -0.90149003 |
| H | -3.51656228 | -0.99022710 | -1.45442826 |
| H | -4.27824553 | 0.16115207  | -0.33578193 |
| H | -3.17253999 | 0.74352653  | -1.60848207 |
| C | -2.40517602 | -1.09200812 | 1.13423346  |
| H | -3.18280502 | -1.80952371 | 0.87123743  |
| H | -1.48904704 | -1.65173958 | 1.30692017  |
| H | -2.71843876 | -0.57326790 | 2.04616383  |
| O | -0.93051882 | 1.08536822  | -1.34988122 |

### Proline 3, *exo*

|   |             |             |             |
|---|-------------|-------------|-------------|
| C | 0.09970946  | -0.68065021 | -0.51819724 |
| C | 0.57704643  | -2.14137391 | -0.38324110 |
| C | 2.10808674  | -2.04874625 | -0.42324759 |
| C | 2.38949241  | -0.73655369 | 0.30845078  |
| H | -0.14513370 | -0.43634662 | -1.54972729 |
| H | 0.25411784  | -2.52675571 | 0.58425790  |
| H | 0.16370872  | -2.77574177 | -1.16729184 |
| H | 2.59588866  | -2.90238385 | 0.04830388  |
| H | 2.46391590  | -1.97870560 | -1.45448009 |
| H | 2.37606654  | -0.88117957 | 1.39433617  |
| H | 3.34306385  | -0.29065728 | 0.02765116  |
| C | 1.19717073  | 1.45797099  | -0.07305435 |
| C | -1.07289224 | -0.40683441 | 0.43762760  |
| O | 0.18586468  | 2.05002393  | -0.44269464 |
| O | -0.89914210 | -0.57887465 | 1.63850826  |
| C | 2.41549949  | 2.19621006  | 0.43852018  |
| H | 3.27081643  | 2.04617547  | -0.22549976 |
| H | 2.17865741  | 3.25634266  | 0.47950215  |
| H | 2.69963058  | 1.84597633  | 1.43336175  |
| C | -3.37319680 | 0.23209991  | 0.80709340  |
| H | -3.16538970 | -0.22685653 | 1.76917161  |
| H | -3.49168952 | 1.31143297  | 0.94997319  |
| H | -4.29903313 | -0.17397823 | 0.39455514  |
| N | 1.27064480  | 0.10614637  | -0.11282347 |
| N | -2.26816323 | -0.05159830 | -0.09879163 |
| C | -2.41799465 | 0.40169041  | -1.48154443 |
| H | -2.26423818 | -0.41279562 | -2.19285640 |
| H | -3.43740278 | 0.76114593  | -1.61061632 |
| H | -1.72780464 | 1.21881718  | -1.69614702 |

### Proline 4, *endo*

|   |             |             |             |
|---|-------------|-------------|-------------|
| C | 0.08419572  | 0.59225115  | -0.69349426 |
| H | 0.26338618  | -0.04908266 | -1.55043388 |
| C | -2.00910679 | 1.51737258  | 0.14643924  |
| H | -2.38960298 | 1.47637985  | 1.16653433  |
| H | -2.86042963 | 1.60916424  | -0.53601318 |
| C | -1.00021551 | 2.65155624  | -0.05091213 |
| H | -0.49153255 | 2.85414900  | 0.89030743  |
| H | -1.47952287 | 3.56799354  | -0.39627269 |
| C | -0.00361119 | 2.08161674  | -1.06897823 |
| H | -0.39216967 | 2.17394274  | -2.08621277 |
| H | 0.96850833  | 2.57304468  | -1.03163435 |
| N | -1.24809372 | 0.29744747  | -0.17053930 |
| C | -1.66120014 | -0.95341820 | 0.05213522  |
| C | -3.04759307 | -1.10089089 | 0.62116597  |
| H | -3.07740843 | -0.70717632 | 1.64173447  |
| H | -3.78263581 | -0.54516065 | 0.03201646  |
| H | -3.32281189 | -2.15037853 | 0.64389272  |
| C | 1.12828660  | 0.36524522  | 0.41369983  |
| N | 2.34328688  | -0.11675198 | 0.04017266  |
| C | 3.31729708  | -0.42064575 | 1.08019901  |
| H | 3.37067639  | -1.50056789 | 1.25348195  |
| H | 4.30429620  | -0.06146650 | 0.78078135  |
| H | 3.01131093  | 0.06908976  | 1.99976159  |
| C | 2.61022619  | -0.67266105 | -1.28237036 |
| H | 3.67665293  | -0.88165119 | -1.35381419 |
| H | 2.05499237  | -1.60096303 | -1.44585206 |
| H | 2.36473004  | 0.03795544  | -2.07165052 |
| O | 0.86103956  | 0.69766161  | 1.56192211  |
| S | -0.70795115 | -2.29215566 | -0.26226642 |

### Proline 4, *exo*

|   |             |             |             |
|---|-------------|-------------|-------------|
| C | 0.00705592  | 0.75750680  | -0.50793317 |
| C | -0.23288441 | 2.28342281  | -0.52742121 |
| C | -1.75923686 | 2.43617859  | -0.49577024 |
| C | -2.20632809 | 1.24739462  | 0.35042661  |
| H | 0.21078631  | 0.35618510  | -1.49772727 |
| H | 0.20273080  | 2.72845990  | 0.36794371  |
| H | 0.22497968  | 2.75059707  | -1.39903181 |
| H | -2.07989283 | 3.38952025  | -0.07513534 |
| H | -2.17683867 | 2.34910926  | -1.50193149 |
| H | -2.09369205 | 1.45431979  | 1.41976444  |
| H | -3.23351981 | 0.94744471  | 0.15616283  |
| C | -1.47823816 | -1.12297877 | 0.02143132  |
| C | 1.11403816  | 0.40677831  | 0.50082754  |
| O | 0.86217418  | 0.49194283  | 1.69564365  |
| C | -2.80870819 | -1.56009830 | 0.57792325  |
| H | -3.62787666 | -1.23292280 | -0.06976896 |
| H | -2.83266156 | -2.64263376 | 0.64894149  |
| H | -2.97495156 | -1.12937202 | 1.56924171  |
| C | 3.37608329  | -0.30694332 | 0.95629417  |
| H | 3.08335338  | -0.00090855 | 1.95612826  |
| H | 3.48383292  | -1.39676153 | 0.93670945  |
| H | 4.33312744  | 0.14854517  | 0.69438556  |
| N | -1.26700319 | 0.19386234  | -0.04904863 |
| N | 2.35113480  | 0.12329439  | 0.01424389  |
| C | 2.60815069  | -0.15725229 | -1.39394663 |
| H | 2.27030131  | 0.65922339  | -2.03234532 |
| H | 3.68443158  | -0.25182519 | -1.53056666 |
| H | 2.12517486  | -1.08707074 | -1.70833176 |
| S | -0.34492327 | -2.24711803 | -0.47890941 |

### Proline 5, *endo*

|   |             |             |             |
|---|-------------|-------------|-------------|
| C | -0.14799602 | -0.24474111 | 0.90202899  |
| H | 0.05785554  | 0.45566921  | 1.70534740  |
| C | -2.34974882 | -0.93819827 | 0.08171079  |
| H | -2.64284687 | -1.03703458 | -0.96422457 |
| H | -3.24939889 | -0.74589243 | 0.67553799  |
| C | -1.59984019 | -2.18270197 | 0.57584828  |
| H | -1.16364468 | -2.70545880 | -0.27194412 |
| H | -2.26043784 | -2.86795571 | 1.10853236  |
| C | -0.48399799 | -1.63477531 | 1.47900652  |
| H | -0.84625728 | -1.50509384 | 2.50163194  |
| H | 0.38780535  | -2.28683706 | 1.50790839  |
| N | -1.39013650 | 0.15754558  | 0.25285085  |
| C | -1.51623653 | 1.42619863  | -0.20640265 |
| C | -2.79200224 | 1.75747191  | -0.94661736 |
| H | -2.81806703 | 1.22443005  | -1.90070888 |
| H | -3.67808954 | 1.46479874  | -0.37921690 |
| H | -2.81305920 | 2.82783782  | -1.13502515 |
| C | 1.02308513  | -0.27512050 | -0.08546202 |
| N | 2.14351964  | 0.36506714  | 0.27726521  |
| C | 3.32288957  | 0.29945682  | -0.58187099 |
| H | 3.20037529  | 0.94386351  | -1.45721427 |
| H | 4.19177127  | 0.61832046  | -0.00922147 |
| H | 3.46226953  | -0.71918054 | -0.93715524 |
| C | 2.18787927  | 1.33442674  | 1.38121188  |
| H | 3.11781067  | 1.89170673  | 1.30457872  |
| H | 1.35575717  | 2.03325217  | 1.29928981  |
| H | 2.17053954  | 0.83755993  | 2.35406352  |
| S | 0.87694052  | -1.12660924 | -1.51839299 |
| O | -0.62723889 | 2.25709396  | -0.03095603 |

### Proline 5, *exo*

|   |             |             |             |
|---|-------------|-------------|-------------|
| C | 0.17829230  | -0.45890184 | -0.76795826 |
| C | 0.58609692  | -1.93493702 | -0.98712277 |
| C | 2.11790579  | -1.93407041 | -0.87750694 |
| C | 2.39251360  | -0.84134639 | 0.15602409  |
| H | 0.00654197  | 0.03178444  | -1.72282049 |
| H | 0.15596964  | -2.54368472 | -0.19343349 |
| H | 0.22732441  | -2.30799082 | -1.94671938 |
| H | 2.51579280  | -2.90333511 | -0.57548422 |
| H | 2.57432304  | -1.66018738 | -1.83212079 |
| H | 2.26411179  | -1.22007906 | 1.17510261  |
| H | 3.38748477  | -0.40899469 | 0.06105629  |
| C | 1.38121054  | 1.47618451  | 0.10454138  |
| C | -1.04974162 | -0.32530986 | 0.13817131  |
| C | 2.59501731  | 2.01727570  | 0.82736765  |
| H | 3.49636500  | 1.90513945  | 0.21930834  |
| H | 2.42907589  | 3.07294891  | 1.02654623  |
| H | 2.75813551  | 1.48757744  | 1.76853582  |
| C | -3.37192836 | 0.29786886  | 0.41069036  |
| H | -3.50681012 | -0.62413769 | 0.97215723  |
| H | -3.30172949 | 1.11926588  | 1.12960562  |
| H | -4.21987574 | 0.46090040  | -0.25207015 |
| N | 1.36139977  | 0.14699943  | -0.15331754 |
| N | -2.15620817 | 0.20923083  | -0.39345781 |
| C | -2.15937805 | 0.92571546  | -1.67612533 |
| H | -2.06267740 | 0.23856994  | -2.51982950 |
| H | -3.10904026 | 1.44540321  | -1.77213130 |
| H | -1.35477694 | 1.66031427  | -1.69199764 |
| S | -0.95569310 | -0.88427205 | 1.71224117  |
| O | 0.45139821  | 2.20316829  | -0.23835250 |

### Proline 6, *endo*

|   |             |             |             |
|---|-------------|-------------|-------------|
| C | -0.00225593 | 0.40291628  | -0.86066791 |
| H | 0.10168729  | -0.35541442 | -1.63003343 |
| C | -2.03685685 | 1.51966818  | -0.10653942 |
| H | -2.33018009 | 1.66300385  | 0.93334399  |
| H | -2.93907519 | 1.51422447  | -0.72554882 |
| C | -1.03459639 | 2.58284694  | -0.56790337 |
| H | -0.50945343 | 2.98568265  | 0.29553475  |
| H | -1.52594839 | 3.40224651  | -1.09340779 |
| C | -0.05212169 | 1.81894527  | -1.46602993 |
| H | -0.43451602 | 1.74959887  | -2.48719095 |
| H | 0.93260949  | 2.28368667  | -1.50299130 |
| N | -1.32298316 | 0.24170169  | -0.26465398 |
| C | -1.78394586 | -0.95505463 | 0.11165152  |
| C | -3.14273161 | -0.96372393 | 0.75813788  |
| H | -3.10544089 | -0.42323225 | 1.70902342  |
| H | -3.88749849 | -0.46983557 | 0.12747411  |
| H | -3.45269881 | -1.98648142 | 0.94620112  |
| C | 1.11020035  | 0.25537891  | 0.18049579  |
| N | 2.24533566  | -0.32435747 | -0.23506492 |
| C | 3.36118075  | -0.45689951 | 0.69888677  |
| H | 3.10551187  | -1.14703596 | 1.50701806  |
| H | 4.23050190  | -0.82516156 | 0.15894066  |
| H | 3.58441445  | 0.50916448  | 1.15002080  |
| C | 2.34976559  | -1.01872516 | -1.52285244 |
| H | 3.34135261  | -1.45560269 | -1.59991717 |
| H | 1.60733633  | -1.81802450 | -1.58518244 |
| H | 2.21934539  | -0.33023649 | -2.35961560 |
| S | -0.91294240 | -2.36933667 | -0.09138533 |
| S | 0.91050350  | 0.88405744  | 1.71565594  |

### Proline 6, *exo*

|   |             |             |             |
|---|-------------|-------------|-------------|
| C | 0.05546977  | -0.61412938 | -0.71667258 |
| C | 0.22574025  | -2.13395527 | -0.95012281 |
| C | 1.73970486  | -2.37101764 | -0.87086183 |
| C | 2.20019517  | -1.33381710 | 0.15029368  |
| H | -0.06674733 | -0.08118232 | -1.65644422 |
| H | -0.27919685 | -2.67732277 | -0.15222316 |
| H | -0.20583176 | -2.43929330 | -1.90340861 |
| H | 1.98928328  | -3.38848772 | -0.56915061 |
| H | 2.21398671  | -2.17445499 | -1.83545570 |
| H | 2.01678945  | -1.67366784 | 1.17419153  |
| H | 3.24875209  | -1.06653448 | 0.04396521  |
| C | 1.61815592  | 1.09997595  | 0.07987272  |
| C | -1.11105413 | -0.32622038 | 0.23085637  |
| C | 2.93378631  | 1.38678818  | 0.75488004  |
| H | 3.77248813  | 1.07936348  | 0.12291708  |
| H | 3.01653024  | 2.45102687  | 0.94986940  |
| H | 3.00704592  | 0.83869180  | 1.69835532  |
| C | -3.40281559 | 0.36802509  | 0.54364719  |
| H | -3.57680211 | -0.48388784 | 1.19937933  |
| H | -3.21300112 | 1.23966911  | 1.17553711  |
| H | -4.27761025 | 0.54556944  | -0.07776870 |
| N | 1.33469414  | -0.18582513 | -0.14316804 |
| N | -2.25436002 | 0.10232782  | -0.31917234 |
| C | -2.34645683 | 0.52351841  | -1.71996667 |
| H | -2.13575390 | -0.30459302 | -2.39884883 |
| H | -3.35981156 | 0.86459422  | -1.91226653 |
| H | -1.65329944 | 1.34572388  | -1.91396789 |
| S | 0.58234435  | 2.34221191  | -0.34633146 |
| S | -0.93522566 | -0.66709698 | 1.85726500  |

## Set $\omega$ B97X-D4/6-311+G(2d,p)

### Proline 1, *endo*

|   |             |             |             |
|---|-------------|-------------|-------------|
| C | 0.03372990  | 0.01106943  | -0.03564318 |
| H | 1.12054779  | -0.08812895 | -0.05210496 |
| C | -1.46547080 | 1.92835009  | 0.04966935  |
| H | -2.31242766 | 2.13754726  | -0.60934461 |
| H | -1.10659833 | 2.87855430  | 0.46599269  |
| C | -1.83632461 | 0.93498847  | 1.15808216  |
| H | -2.62303228 | 0.26534673  | 0.80008443  |
| H | -2.19227228 | 1.43640464  | 2.06105242  |
| C | -0.54139640 | 0.14502995  | 1.38353686  |
| H | 0.16123997  | 0.71897612  | 1.99649761  |
| H | -0.69906046 | -0.82321332 | 1.86470159  |
| N | -0.38862881 | 1.24456267  | -0.67358064 |
| C | 0.04194475  | 1.50965145  | -1.93827765 |
| O | 0.83582087  | 0.76546112  | -2.49623449 |
| C | -0.50607644 | 2.75520763  | -2.59733702 |
| H | -1.55126794 | 2.59303646  | -2.88148852 |
| H | -0.46659457 | 3.61966701  | -1.92815160 |
| H | 0.07816724  | 2.95228725  | -3.49537349 |
| C | -0.56919724 | -1.19393159 | -0.75023947 |
| O | 0.20456131  | -2.27712674 | -0.60630431 |
| C | -0.29421278 | -3.46371766 | -1.24050259 |
| H | -0.41649371 | -3.29011552 | -2.31123900 |
| H | 0.45625986  | -4.23138712 | -1.05693905 |
| H | -1.25532266 | -3.74970938 | -0.80783502 |
| O | -1.63124601 | -1.19225301 | -1.32075630 |

### Proline 1, *exo*

|   |             |             |             |
|---|-------------|-------------|-------------|
| C | -0.01607159 | -0.00389190 | 0.05628326  |
| C | 1.52397586  | -0.03497666 | 0.13076302  |
| C | 1.92990635  | 1.43589199  | -0.01944054 |
| C | 0.82660874  | 2.17153012  | 0.74148174  |
| H | -0.39211548 | -0.22147393 | -0.94787073 |
| H | 1.82903575  | -0.40256689 | 1.11621192  |
| H | 1.95656177  | -0.68749389 | -0.63018370 |
| H | 2.92553412  | 1.64478190  | 0.37898850  |
| H | 1.91144376  | 1.73190169  | -1.07380683 |
| H | 1.03157146  | 2.18382659  | 1.82076572  |
| H | 0.69165448  | 3.20075095  | 0.40043327  |
| C | -1.65624111 | 1.70267537  | 0.61069065  |
| C | -0.62592640 | -1.00379090 | 1.02976441  |
| O | -2.54704655 | 0.89905402  | 0.37182333  |
| O | -0.64595498 | -0.85456981 | 2.22507424  |
| C | -1.93602543 | 3.10880043  | 1.09288357  |
| H | -1.60421434 | 3.84534439  | 0.35393971  |
| H | -3.01009556 | 3.20868883  | 1.24316906  |
| H | -1.41212503 | 3.31123292  | 2.03208658  |
| N | -0.35073108 | 1.35959609  | 0.44394265  |
| O | -1.06557087 | -2.09668537 | 0.39691619  |
| H | -2.52966313 | -2.65637295 | 1.75769829  |
| H | -1.96272823 | -3.89751413 | 0.59176252  |
| H | -0.94129056 | -3.43063344 | 1.99308513  |
| C | -1.66256040 | -3.08359838 | 1.25025442  |

### Proline 2, *endo*

|   |             |             |             |
|---|-------------|-------------|-------------|
| C | 0.00947181  | -0.00084354 | -0.06366532 |
| H | 1.09555571  | -0.07926075 | -0.09633463 |
| C | -1.48382758 | 1.91529309  | 0.01722299  |
| H | -2.33307848 | 2.14061591  | -0.62940823 |
| H | -1.09233240 | 2.85696955  | 0.41843200  |
| C | -1.84829794 | 0.93579588  | 1.13503667  |
| H | -2.63591508 | 0.26279243  | 0.79040040  |
| H | -2.19726370 | 1.44870252  | 2.03288049  |
| C | -0.55062592 | 0.15372046  | 1.35778603  |
| H | 0.15560196  | 0.73627438  | 1.95609916  |
| H | -0.69941152 | -0.80782245 | 1.85133787  |
| N | -0.43380027 | 1.21152678  | -0.73314615 |
| C | 0.02645539  | 1.55604039  | -1.94090792 |
| S | 1.12728392  | 0.63162751  | -2.76713641 |
| C | -0.52319948 | 2.83358777  | -2.51808375 |
| H | -1.57729559 | 2.69691489  | -2.78111544 |
| H | -0.46079279 | 3.65542568  | -1.79848152 |
| H | 0.03025272  | 3.09153778  | -3.41697102 |
| C | -0.58749325 | -1.22446444 | -0.74790342 |
| O | 0.19403222  | -2.29564597 | -0.58126386 |
| C | -0.28997857 | -3.50001152 | -1.19259280 |
| H | -0.41389193 | -3.34723777 | -2.26549878 |
| H | 0.47019438  | -4.25380867 | -0.99609383 |
| H | -1.24594173 | -3.79118793 | -0.75418133 |
| O | -1.65905318 | -1.23998470 | -1.29814599 |

### Proline 2, *exo*

|   |             |             |             |
|---|-------------|-------------|-------------|
| C | -0.06883405 | 0.00600774  | 0.06591486  |
| C | 1.47175226  | -0.04730213 | 0.10318482  |
| C | 1.89592140  | 1.42087483  | 0.00684913  |
| C | 0.81049273  | 2.14049944  | 0.80262460  |
| H | -0.47707297 | -0.18572942 | -0.92834764 |
| H | 1.79947161  | -0.46397970 | 1.05957101  |
| H | 1.87265046  | -0.67035247 | -0.69661219 |
| H | 2.89514551  | 1.60209049  | 0.40672552  |
| H | 1.87551860  | 1.75903302  | -1.03333173 |
| H | 1.00938763  | 2.09691727  | 1.87995157  |
| H | 0.69150493  | 3.18346230  | 0.51089489  |
| C | -1.65462766 | 1.79579088  | 0.56937614  |
| C | -0.65402708 | -1.00430782 | 1.04239780  |
| S | -2.94361397 | 0.83869474  | 0.15958732  |
| O | -0.70917800 | -0.83273981 | 2.23256305  |
| C | -1.84467053 | 3.20754622  | 1.06086632  |
| H | -1.42603947 | 3.92250266  | 0.34523250  |
| H | -2.90675718 | 3.40698950  | 1.17455606  |
| H | -1.34128421 | 3.35563906  | 2.02090274  |
| N | -0.39131298 | 1.36548655  | 0.48300184  |
| O | -0.99237511 | -2.13771735 | 0.42037683  |
| H | -2.47154561 | -2.76828584 | 1.73105868  |
| H | -1.77001711 | -3.99196577 | 0.62356751  |
| H | -0.84662180 | -3.42386958 | 2.05331730  |
| C | -1.55593581 | -3.14477777 | 1.27248749  |

### Proline 3, *endo*

|   |             |             |             |
|---|-------------|-------------|-------------|
| C | 0.07270827  | 0.44560956  | 0.79661472  |
| H | -0.20266526 | -0.12020550 | 1.68334375  |
| C | 2.29629608  | 0.96576987  | -0.06708237 |
| H | 2.67051846  | 0.85033780  | -1.08587010 |
| H | 3.14809759  | 0.91754153  | 0.62214926  |
| C | 1.50563231  | 2.26666545  | 0.10564576  |
| H | 1.03765559  | 2.53578696  | -0.84105383 |
| H | 2.14063773  | 3.09111953  | 0.43638226  |
| C | 0.42335468  | 1.90430719  | 1.12997393  |
| H | 0.82458733  | 1.95043477  | 2.14701799  |
| H | -0.44731513 | 2.56025526  | 1.07784303  |
| N | 1.32146547  | -0.07794747 | 0.25728370  |
| C | 1.36754212  | -1.37608774 | -0.12684671 |
| O | 0.41563942  | -2.12381895 | 0.07209922  |
| C | 2.63260902  | -1.84484122 | -0.80988071 |
| H | 2.67058019  | -1.44372954 | -1.82703868 |
| H | 3.52866084  | -1.51050517 | -0.28152267 |
| H | 2.61372041  | -2.93216326 | -0.85864743 |
| C | -1.01331261 | 0.37491953  | -0.28572225 |
| N | -2.23068828 | -0.11733349 | 0.05991219  |
| C | -3.23178939 | -0.24125630 | -0.99016597 |
| H | -3.20193305 | -1.23813897 | -1.44530143 |
| H | -4.22449234 | -0.07164792 | -0.56650262 |
| H | -3.03079670 | 0.49858782  | -1.76155884 |
| C | -2.44384290 | -0.91629184 | 1.26455155  |
| H | -3.47209647 | -1.27855594 | 1.25068318  |
| H | -1.76831214 | -1.77512970 | 1.29334441  |
| H | -2.32097737 | -0.31846147 | 2.17094652  |
| O | -0.76728388 | 0.81587922  | -1.40119786 |

### Proline 3, *exo*

|   |             |             |             |
|---|-------------|-------------|-------------|
| C | 0.11004522  | -0.68177199 | -0.54879226 |
| C | 0.57609605  | -2.14111394 | -0.38976363 |
| C | 2.10601494  | -2.05555211 | -0.43573367 |
| C | 2.39233037  | -0.73869584 | 0.28439782  |
| H | -0.13840941 | -0.44823070 | -1.58328955 |
| H | 0.25548953  | -2.50899425 | 0.58715696  |
| H | 0.15708176  | -2.78892107 | -1.16179631 |
| H | 2.59280246  | -2.90789745 | 0.04202081  |
| H | 2.45898913  | -1.99386370 | -1.46985062 |
| H | 2.37154422  | -0.87224587 | 1.37270997  |
| H | 3.35063940  | -0.30011609 | 0.00122661  |
| C | 1.17611314  | 1.44536629  | -0.05264770 |
| C | -1.04918710 | -0.38263281 | 0.41204290  |
| O | 0.14857578  | 2.02337917  | -0.39132249 |
| O | -0.84704569 | -0.48921730 | 1.61337694  |
| C | 2.37945125  | 2.18651973  | 0.48601374  |
| H | 3.24586774  | 2.05040473  | -0.16722936 |
| H | 2.13200945  | 3.24488388  | 0.54136336  |
| H | 2.64477890  | 1.81888098  | 1.48083002  |
| C | -3.32441998 | 0.28517530  | 0.81639493  |
| H | -3.13633675 | -0.19079149 | 1.77591111  |
| H | -3.35519767 | 1.37113925  | 0.96358221  |
| H | -4.28614423 | -0.04965996 | 0.42045883  |
| N | 1.28056000  | 0.09944859  | -0.15412083 |
| N | -2.26547608 | -0.08363685 | -0.11266275 |
| C | -2.43765221 | 0.35201066  | -1.49591274 |
| H | -2.17596769 | -0.43992958 | -2.20103262 |
| H | -3.49220319 | 0.58476079  | -1.64690134 |
| H | -1.84304933 | 1.24530164  | -1.70533033 |



### Proline 4, *endo*

|   |             |             |             |
|---|-------------|-------------|-------------|
| C | 0.07929850  | 0.59581809  | -0.71529799 |
| H | 0.26301421  | -0.03815514 | -1.57911647 |
| C | -2.01136322 | 1.51543945  | 0.12739824  |
| H | -2.39866596 | 1.46331903  | 1.14581134  |
| H | -2.85635721 | 1.61839100  | -0.56294838 |
| C | -0.99624562 | 2.64711903  | -0.04711822 |
| H | -0.48926716 | 2.83135497  | 0.90041202  |
| H | -1.47042645 | 3.57227921  | -0.38027921 |
| C | -0.00040062 | 2.08807718  | -1.07011038 |
| H | -0.38812832 | 2.19625713  | -2.08755450 |
| H | 0.97581296  | 2.57411412  | -1.02353419 |
| N | -1.24990432 | 0.30205773  | -0.19656388 |
| C | -1.63905948 | -0.94658380 | 0.05537849  |
| C | -3.01688375 | -1.10673384 | 0.64035641  |
| H | -3.02362832 | -0.72736612 | 1.66731939  |
| H | -3.76120008 | -0.54375065 | 0.06959773  |
| H | -3.28555891 | -2.15963871 | 0.65370213  |
| C | 1.10959444  | 0.35814193  | 0.39796444  |
| N | 2.33203037  | -0.10563397 | 0.03345488  |
| C | 3.28845188  | -0.42110818 | 1.08439263  |
| H | 3.30318532  | -1.49888759 | 1.28309182  |
| H | 4.28862065  | -0.10093989 | 0.78082010  |
| H | 2.99705484  | 0.09966842  | 1.99334325  |
| C | 2.60079913  | -0.66926474 | -1.28406433 |
| H | 3.66150016  | -0.91730930 | -1.33576255 |
| H | 2.01562699  | -1.57786247 | -1.45809480 |
| H | 2.39663572  | 0.05290292  | -2.07741957 |
| O | 0.82451263  | 0.67239070  | 1.54488728  |
| S | -0.66404838 | -2.26219652 | -0.23626568 |

### Proline 4, *exo*

|   |             |             |             |
|---|-------------|-------------|-------------|
| C | 0.00105511  | 0.76002756  | -0.52711773 |
| C | -0.23134838 | 2.28386434  | -0.52509945 |
| C | -1.75602256 | 2.43768443  | -0.51321494 |
| C | -2.21159790 | 1.24794541  | 0.32629944  |
| H | 0.20734805  | 0.36694320  | -1.52153779 |
| H | 0.19095664  | 2.71125481  | 0.38719270  |
| H | 0.24139610  | 2.76676926  | -1.38196283 |
| H | -2.08325606 | 3.39159140  | -0.09575895 |
| H | -2.16064681 | 2.34860441  | -1.52602811 |
| H | -2.10691527 | 1.45128746  | 1.39811206  |
| H | -3.23860076 | 0.94897576  | 0.11870497  |
| C | -1.45724349 | -1.11350271 | 0.03628823  |
| C | 1.09642554  | 0.39588134  | 0.48590399  |
| O | 0.82764826  | 0.45805739  | 1.67631115  |
| C | -2.77445170 | -1.55735134 | 0.61791908  |
| H | -3.60178579 | -1.26680916 | -0.03742953 |
| H | -2.77390789 | -2.63876321 | 0.72459121  |
| H | -2.93722639 | -1.09400673 | 1.59554862  |
| C | 3.34191940  | -0.34522972 | 0.95482797  |
| H | 3.04105570  | -0.06023002 | 1.96010668  |
| H | 3.43006934  | -1.43686257 | 0.90666312  |
| H | 4.31103104  | 0.10222292  | 0.71933276  |
| N | -1.26945623 | 0.20060978  | -0.07136119 |
| N | 2.33951135  | 0.12836001  | 0.01137111  |
| C | 2.60813957  | -0.12443629 | -1.39793649 |
| H | 2.28078301  | 0.70940108  | -2.02190161 |
| H | 3.68735432  | -0.21918417 | -1.52513627 |
| H | 2.12732393  | -1.04734407 | -1.73827874 |
| S | -0.30895814 | -2.21786059 | -0.43820948 |

### Proline 5, *endo*

|   |             |             |             |
|---|-------------|-------------|-------------|
| C | -0.16217581 | -0.22435164 | 0.93585695  |
| H | 0.04827783  | 0.47382915  | 1.74199962  |
| C | -2.34086161 | -0.93881132 | 0.08643290  |
| H | -2.59937525 | -1.03272411 | -0.97048636 |
| H | -3.26079336 | -0.76781118 | 0.65695035  |
| C | -1.58381577 | -2.17650484 | 0.58739591  |
| H | -1.14190038 | -2.70108174 | -0.25779650 |
| H | -2.24335701 | -2.86458272 | 1.12056102  |
| C | -0.47767893 | -1.62151266 | 1.49656229  |
| H | -0.84516688 | -1.50715465 | 2.52059858  |
| H | 0.40472485  | -2.26251174 | 1.52127537  |
| N | -1.40627367 | 0.16774978  | 0.29752391  |
| C | -1.50462947 | 1.41932848  | -0.21106716 |
| C | -2.76125387 | 1.74368631  | -0.98433797 |
| H | -2.74535315 | 1.21569911  | -1.94242969 |
| H | -3.65998842 | 1.43536207  | -0.44463460 |
| H | -2.78685253 | 2.81629813  | -1.16758262 |
| C | 0.99124474  | -0.24214504 | -0.06973476 |
| N | 2.12457111  | 0.36944613  | 0.28294199  |
| C | 3.26868207  | 0.32031428  | -0.62142214 |
| H | 3.08097006  | 0.92609078  | -1.51317421 |
| H | 4.14822861  | 0.69305744  | -0.09730151 |
| H | 3.43762737  | -0.70604020 | -0.94672087 |
| C | 2.20572617  | 1.29341683  | 1.41952098  |
| H | 3.16107819  | 1.81222471  | 1.36848889  |
| H | 1.40516914  | 2.03275424  | 1.36042159  |
| H | 2.16087390  | 0.76190677  | 2.37378731  |
| S | 0.80551047  | -1.04717673 | -1.51307940 |
| O | -0.60370845 | 2.23634437  | -0.04814990 |

### Proline 5, *exo*

|   |             |             |             |
|---|-------------|-------------|-------------|
| C | 0.19084728  | -0.44768470 | -0.79989052 |
| C | 0.58127469  | -1.92802372 | -0.99718942 |
| C | 2.11183376  | -1.93928074 | -0.88635545 |
| C | 2.39423223  | -0.83828615 | 0.13538348  |
| H | 0.01639571  | 0.03710053  | -1.75901626 |
| H | 0.14549220  | -2.52232876 | -0.19357761 |
| H | 0.22011338  | -2.31302234 | -1.95283518 |
| H | 2.50133281  | -2.90955306 | -0.57258474 |
| H | 2.57156178  | -1.67843116 | -1.84458156 |
| H | 2.25940480  | -1.20383425 | 1.15955602  |
| H | 3.39440049  | -0.41439035 | 0.03461401  |
| C | 1.36333947  | 1.46799667  | 0.11733641  |
| C | -1.02470229 | -0.29748622 | 0.11779762  |
| C | 2.55792123  | 2.00393206  | 0.87302946  |
| H | 3.47090536  | 1.90876626  | 0.27857910  |
| H | 2.37882058  | 3.05479888  | 1.09237031  |
| H | 2.70078233  | 1.45129938  | 1.80533977  |
| C | -3.32631221 | 0.33403728  | 0.43959520  |
| H | -3.47735887 | -0.59141767 | 0.99449287  |
| H | -3.20144805 | 1.14353565  | 1.16533013  |
| H | -4.19043849 | 0.53274326  | -0.19398474 |
| N | 1.37326219  | 0.15063574  | -0.19198672 |
| N | -2.14131879 | 0.21243187  | -0.40288151 |
| C | -2.17218143 | 0.88304266  | -1.70669317 |
| H | -2.03834311 | 0.17217529  | -2.52607589 |
| H | -3.14713104 | 1.35207767  | -1.82532050 |
| H | -1.40373326 | 1.65693674  | -1.74674898 |
| S | -0.89808803 | -0.80894821 | 1.69526110  |
| O | 0.42023528  | 2.18227738  | -0.20806323 |

### Proline 6, *endo*

|   |             |             |             |
|---|-------------|-------------|-------------|
| C | -0.01192970 | 0.39724909  | -0.89237056 |
| H | 0.09387329  | -0.35903276 | -1.66597001 |
| C | -2.03150823 | 1.51698495  | -0.11573889 |
| H | -2.30611979 | 1.64985670  | 0.93199632  |
| H | -2.94236667 | 1.52480370  | -0.72360253 |
| C | -1.02797307 | 2.57876570  | -0.57737362 |
| H | -0.50139520 | 2.98250748  | 0.28630261  |
| H | -1.52043713 | 3.39936758  | -1.10272363 |
| C | -0.04934445 | 1.81698335  | -1.48013097 |
| H | -0.43079024 | 1.76244433  | -2.50390749 |
| H | 0.94063600  | 2.27528701  | -1.50917056 |
| N | -1.32769167 | 0.24094466  | -0.29760518 |
| C | -1.76519131 | -0.94995928 | 0.10983150  |
| C | -3.10808221 | -0.96371045 | 0.78765505  |
| H | -3.02740075 | -0.45494878 | 1.75400985  |
| H | -3.86272782 | -0.43961411 | 0.19415495  |
| H | -3.42171295 | -1.99077174 | 0.95391300  |
| C | 1.08655033  | 0.24506586  | 0.15831726  |
| N | 2.22542900  | -0.32698520 | -0.23854636 |
| C | 3.31186397  | -0.47415680 | 0.72465341  |
| H | 3.00658242  | -1.13035843 | 1.54453502  |
| H | 4.18053965  | -0.89190288 | 0.21740222  |
| H | 3.56351362  | 0.49692145  | 1.15356875  |
| C | 2.35617110  | -0.99569884 | -1.53466357 |
| H | 3.36317102  | -1.40003641 | -1.61506766 |
| H | 1.63892186  | -1.81729506 | -1.61511618 |
| H | 2.20992355  | -0.29505408 | -2.36002782 |
| S | -0.87592113 | -2.34311930 | -0.07540671 |
| S | 0.85991650  | 0.85946229  | 1.68448180  |

### Proline 6, *exo*

|   |             |             |             |
|---|-------------|-------------|-------------|
| C | 0.06442536  | -0.60865592 | -0.74283963 |
| C | 0.22394078  | -2.12890660 | -0.96075300 |
| C | 1.73457843  | -2.37501681 | -0.86775460 |
| C | 2.19384380  | -1.33211726 | 0.14707479  |
| H | -0.05882461 | -0.07619537 | -1.68470601 |
| H | -0.29040114 | -2.66190864 | -0.15969817 |
| H | -0.20163459 | -2.44263838 | -1.91576737 |
| H | 1.97532976  | -3.39241636 | -0.55448339 |
| H | 2.21793776  | -2.18937932 | -1.83159834 |
| H | 2.00237057  | -1.66033162 | 1.17412093  |
| H | 3.24602423  | -1.07102969 | 0.04065973  |
| C | 1.60193909  | 1.09443541  | 0.08130504  |
| C | -1.09267706 | -0.31695759 | 0.21029084  |
| C | 2.90663526  | 1.38640611  | 0.77399414  |
| H | 3.75369020  | 1.09388344  | 0.14552267  |
| H | 2.97323575  | 2.45096601  | 0.98139017  |
| H | 2.96980853  | 0.82655617  | 1.71203818  |
| C | -3.36478412 | 0.38497365  | 0.56024129  |
| H | -3.55931434 | -0.48038184 | 1.19485458  |
| H | -3.13556461 | 1.23251595  | 1.21251859  |
| H | -4.24314345 | 0.60742205  | -0.04427904 |
| N | 1.33668312  | -0.18710641 | -0.16590323 |
| N | -2.23800831 | 0.10690848  | -0.32426851 |
| C | -2.35113641 | 0.50446776  | -1.72813721 |
| H | -2.13173280 | -0.33204159 | -2.39577164 |
| H | -3.37499293 | 0.82139183  | -1.91604926 |
| H | -1.67670396 | 1.33794911  | -1.94316204 |
| S | 0.55453310  | 2.31766285  | -0.33156691 |
| S | -0.89905739 | -0.64445540 | 1.82792739  |

## Set $\omega$ B97X-V /6-311+G(2d,p)

### Proline 1, *endo*

|   |             |             |             |
|---|-------------|-------------|-------------|
| C | 0.03372990  | 0.01106943  | -0.03564318 |
| H | 1.12054779  | -0.08812895 | -0.05210496 |
| C | -1.46547080 | 1.92835009  | 0.04966935  |
| H | -2.31242766 | 2.13754726  | -0.60934461 |
| H | -1.10659833 | 2.87855430  | 0.46599269  |
| C | -1.83632461 | 0.93498847  | 1.15808216  |
| H | -2.62303228 | 0.26534673  | 0.80008443  |
| H | -2.19227228 | 1.43640464  | 2.06105242  |
| C | -0.54139640 | 0.14502995  | 1.38353686  |
| H | 0.16123997  | 0.71897612  | 1.99649761  |
| H | -0.69906046 | -0.82321332 | 1.86470159  |
| N | -0.38862881 | 1.24456267  | -0.67358064 |
| C | 0.04194475  | 1.50965145  | -1.93827765 |
| O | 0.83582087  | 0.76546112  | -2.49623449 |
| C | -0.50607644 | 2.75520763  | -2.59733702 |
| H | -1.55126794 | 2.59303646  | -2.88148852 |
| H | -0.46659457 | 3.61966701  | -1.92815160 |
| H | 0.07816724  | 2.95228725  | -3.49537349 |
| C | -0.56919724 | -1.19393159 | -0.75023947 |
| O | 0.20456131  | -2.27712674 | -0.60630431 |
| C | -0.29421278 | -3.46371766 | -1.24050259 |
| H | -0.41649371 | -3.29011552 | -2.31123900 |
| H | 0.45625986  | -4.23138712 | -1.05693905 |
| H | -1.25532266 | -3.74970938 | -0.80783502 |
| O | -1.63124601 | -1.19225301 | -1.32075630 |

### Proline 1, *exo*

|   |             |             |             |
|---|-------------|-------------|-------------|
| C | -0.01607159 | -0.00389190 | 0.05628326  |
| C | 1.52397586  | -0.03497666 | 0.13076302  |
| C | 1.92990635  | 1.43589199  | -0.01944054 |
| C | 0.82660874  | 2.17153012  | 0.74148174  |
| H | -0.39211548 | -0.22147393 | -0.94787073 |
| H | 1.82903575  | -0.40256689 | 1.11621192  |
| H | 1.95656177  | -0.68749389 | -0.63018370 |
| H | 2.92553412  | 1.64478190  | 0.37898850  |
| H | 1.91144376  | 1.73190169  | -1.07380683 |
| H | 1.03157146  | 2.18382659  | 1.82076572  |
| H | 0.69165448  | 3.20075095  | 0.40043327  |
| C | -1.65624111 | 1.70267537  | 0.61069065  |
| C | -0.62592640 | -1.00379090 | 1.02976441  |
| O | -2.54704655 | 0.89905402  | 0.37182333  |
| O | -0.64595498 | -0.85456981 | 2.22507424  |
| C | -1.93602543 | 3.10880043  | 1.09288357  |
| H | -1.60421434 | 3.84534439  | 0.35393971  |
| H | -3.01009556 | 3.20868883  | 1.24316906  |
| H | -1.41212503 | 3.31123292  | 2.03208658  |
| N | -0.35073108 | 1.35959609  | 0.44394265  |
| O | -1.06557087 | -2.09668537 | 0.39691619  |
| H | -2.52966313 | -2.65637295 | 1.75769829  |
| H | -1.96272823 | -3.89751413 | 0.59176252  |
| H | -0.94129056 | -3.43063344 | 1.99308513  |
| C | -1.66256040 | -3.08359838 | 1.25025442  |

### Proline 2, *endo*

|   |             |             |             |
|---|-------------|-------------|-------------|
| C | 0.01125632  | -0.00439050 | -0.07360662 |
| H | 1.09894331  | -0.08377832 | -0.11214481 |
| C | -1.49048623 | 1.90718711  | 0.00792777  |
| H | -2.34364590 | 2.12498393  | -0.63875298 |
| H | -1.10418290 | 2.85368100  | 0.40664939  |
| C | -1.84604969 | 0.92809819  | 1.12962890  |
| H | -2.63087321 | 0.24794563  | 0.78795515  |
| H | -2.19692450 | 1.44155311  | 2.02764746  |
| C | -0.54220390 | 0.15477843  | 1.35104061  |
| H | 0.16464225  | 0.74623870  | 1.94223028  |
| H | -0.68248594 | -0.80606571 | 1.85145551  |
| N | -0.43514408 | 1.20861059  | -0.74335226 |
| C | 0.03787851  | 1.57178191  | -1.94306719 |
| S | 1.16195134  | 0.67244201  | -2.76929037 |
| C | -0.52234699 | 2.85068438  | -2.51040466 |
| H | -1.57544650 | 2.70649933  | -2.77838681 |
| H | -0.47012812 | 3.66662266  | -1.78149927 |
| H | 0.03247098  | 3.12320583  | -3.40534345 |
| C | -0.58981914 | -1.23205313 | -0.75021777 |
| O | 0.18860791  | -2.30434663 | -0.57484052 |
| C | -0.30115585 | -3.51126138 | -1.17746318 |
| H | -0.42621895 | -3.36437646 | -2.25192615 |
| H | 0.45688530  | -4.26691612 | -0.97650417 |
| H | -1.25861758 | -3.79480177 | -0.73533728 |
| O | -1.66025776 | -1.24976549 | -1.30413236 |

### Proline 2, *exo*

|   |             |             |             |
|---|-------------|-------------|-------------|
| C | -0.07838646 | 0.00547405  | 0.06476855  |
| C | 1.46384260  | -0.04987035 | 0.09577983  |
| C | 1.89019422  | 1.41877590  | 0.01053857  |
| C | 0.80808420  | 2.13235572  | 0.81653292  |
| H | -0.49203207 | -0.18576573 | -0.92941178 |
| H | 1.79487539  | -0.47525209 | 1.04900673  |
| H | 1.86114999  | -0.66764862 | -0.71150163 |
| H | 2.89193850  | 1.59516809  | 0.40906190  |
| H | 1.86598156  | 1.76629707  | -1.02774584 |
| H | 1.00654859  | 2.07048866  | 1.89465715  |
| H | 0.69360119  | 3.18129670  | 0.54027033  |
| C | -1.66009101 | 1.81008187  | 0.55674780  |
| C | -0.65792345 | -1.00815065 | 1.04335926  |
| S | -2.95793448 | 0.87049307  | 0.12610082  |
| O | -0.71488125 | -0.83627689 | 2.23412543  |
| C | -1.83974445 | 3.22280202  | 1.05339905  |
| H | -1.40778418 | 3.93737841  | 0.34351744  |
| H | -2.90175032 | 3.43246476  | 1.15894703  |
| H | -1.34264967 | 3.36152494  | 2.01947284  |
| N | -0.39833269 | 1.36663292  | 0.48445926  |
| O | -0.98929108 | -2.14423686 | 0.42279505  |
| H | -2.45659657 | -2.78586953 | 1.74267650  |
| H | -1.74895326 | -4.00578663 | 0.63213003  |
| H | -0.82247933 | -3.42631989 | 2.05744012  |
| C | -1.53945441 | -3.15554993 | 1.27958905  |

### Proline 3, *endo*

|   |             |             |             |
|---|-------------|-------------|-------------|
| C | 0.07197830  | 0.44694218  | 0.79207817  |
| H | -0.20219529 | -0.12119369 | 1.68031735  |
| C | 2.30003818  | 0.96756679  | -0.06659845 |
| H | 2.68262658  | 0.85232857  | -1.08392745 |
| H | 3.14713949  | 0.91887908  | 0.63066822  |
| C | 1.50730765  | 2.26824387  | 0.10169107  |
| H | 1.03762495  | 2.53284469  | -0.84711823 |
| H | 2.14140919  | 3.09577605  | 0.42991144  |
| C | 0.42552162  | 1.90607141  | 1.12747396  |
| H | 0.82939163  | 1.94958563  | 2.14502695  |
| H | -0.44533602 | 2.56432886  | 1.07791498  |
| N | 1.32100803  | -0.07635793 | 0.24960982  |
| C | 1.37173859  | -1.37806749 | -0.12525883 |
| O | 0.42083417  | -2.12677007 | 0.07880964  |
| C | 2.63791959  | -1.84880986 | -0.80505120 |
| H | 2.67375804  | -1.45495082 | -1.82630181 |
| H | 3.53429785  | -1.50787724 | -0.27925460 |
| H | 2.62079585  | -2.93734924 | -0.84531608 |
| C | -1.01919125 | 0.37877701  | -0.28766631 |
| N | -2.23489061 | -0.11805797 | 0.06002956  |
| C | -3.24112596 | -0.23381056 | -0.98672228 |
| H | -3.21699255 | -1.23015272 | -1.44578481 |
| H | -4.23211031 | -0.06119452 | -0.55790067 |
| H | -3.03866945 | 0.50882717  | -1.75653250 |
| C | -2.44336600 | -0.92506459 | 1.26137832  |
| H | -3.46744089 | -1.30147536 | 1.23955724  |
| H | -1.75575795 | -1.77598913 | 1.28886049  |
| H | -2.33309795 | -0.32889841 | 2.17202794  |
| O | -0.77901548 | 0.82694831  | -1.40252192 |

### Proline 3, *exo*

|   |             |             |             |
|---|-------------|-------------|-------------|
| C | 0.10930738  | -0.68227516 | -0.54135503 |
| C | 0.57730591  | -2.14225470 | -0.38376148 |
| C | 2.10723223  | -2.05497431 | -0.43768653 |
| C | 2.39503588  | -0.74166849 | 0.28942477  |
| H | -0.13625558 | -0.44576702 | -1.57819459 |
| H | 0.26171667  | -2.50826540 | 0.59732384  |
| H | 0.15361022  | -2.79203622 | -1.15333526 |
| H | 2.59774873  | -2.91037988 | 0.03304857  |
| H | 2.45508412  | -1.98622467 | -1.47432779 |
| H | 2.37774179  | -0.88189495 | 1.37845232  |
| H | 3.35277724  | -0.29929197 | 0.00516205  |
| C | 1.18105031  | 1.44654398  | -0.05174208 |
| C | -1.05605396 | -0.38673034 | 0.41568319  |
| O | 0.15432747  | 2.02468350  | -0.39529413 |
| O | -0.86070321 | -0.49900801 | 1.61827450  |
| C | 2.38701791  | 2.18977445  | 0.47837105  |
| H | 3.24867381  | 2.05705762  | -0.18364083 |
| H | 2.13606812  | 3.24806098  | 0.53600442  |
| H | 2.66303847  | 1.82209158  | 1.47139490  |
| C | -3.33383466 | 0.27895096  | 0.81295932  |
| H | -3.14697864 | -0.19988721 | 1.77244686  |
| H | -3.36658225 | 1.36551898  | 0.96303774  |
| H | -4.29429564 | -0.05668154 | 0.41226063  |
| N | 1.27969225  | 0.09831347  | -0.14084540 |
| N | -2.27076249 | -0.08537980 | -0.11400452 |
| C | -2.43761253 | 0.35875716  | -1.49620004 |
| H | -2.17638690 | -0.43094249 | -2.20584769 |
| H | -3.49212814 | 0.59561308  | -1.64791581 |
| H | -1.83853453 | 1.25229641  | -1.69859299 |

### Proline 4, *endo*

|   |             |             |             |
|---|-------------|-------------|-------------|
| C | 0.07863133  | 0.58426401  | -0.71162139 |
| H | 0.26048400  | -0.05746154 | -1.57290832 |
| C | -2.00675230 | 1.51367928  | 0.13855140  |
| H | -2.38683147 | 1.46692685  | 1.16160355  |
| H | -2.85783276 | 1.61678627  | -0.54659189 |
| C | -0.98960512 | 2.64207065  | -0.04931138 |
| H | -0.47370757 | 2.82924362  | 0.89458505  |
| H | -1.46418674 | 3.56784799  | -0.38364867 |
| C | -0.00313268 | 2.07496719  | -1.07783249 |
| H | -0.40074882 | 2.17538720  | -2.09376078 |
| H | 0.97497783  | 2.56181317  | -1.04367611 |
| N | -1.25175538 | 0.29473989  | -0.18860049 |
| C | -1.65820455 | -0.95329376 | 0.05001414  |
| C | -3.03728041 | -1.09638294 | 0.63987125  |
| H | -3.03966893 | -0.71171825 | 1.66613018  |
| H | -3.77679002 | -0.52735415 | 0.06629233  |
| H | -3.31774178 | -2.14722128 | 0.65736141  |
| C | 1.11399098  | 0.35573855  | 0.40144941  |
| N | 2.33958656  | -0.10215055 | 0.03628873  |
| C | 3.29709861  | -0.41756525 | 1.08717275  |
| H | 3.33423792  | -1.49983941 | 1.26253757  |
| H | 4.29281735  | -0.06874226 | 0.79698123  |
| H | 2.98702445  | 0.07861221  | 2.00499533  |
| C | 2.61757546  | -0.65667695 | -1.28396260 |
| H | 3.68645355  | -0.87131502 | -1.34149192 |
| H | 2.05969011  | -1.58439157 | -1.45644063 |
| H | 2.38647564  | 0.06025746  | -2.07606542 |
| O | 0.82880835  | 0.66905953  | 1.54946169  |
| S | -0.70861361 | -2.28538094 | -0.26358393 |

### Proline 4, *exo*

|   |             |             |             |
|---|-------------|-------------|-------------|
| C | 0.00148212  | 0.74796077  | -0.52717141 |
| C | -0.22963552 | 2.27405432  | -0.53749021 |
| C | -1.75440351 | 2.43117507  | -0.50794998 |
| C | -2.20162824 | 1.24758470  | 0.34524605  |
| H | 0.20692444  | 0.34397896  | -1.51971963 |
| H | 0.20502384  | 2.71043425  | 0.36661726  |
| H | 0.23365793  | 2.74853444  | -1.40579936 |
| H | -2.07439763 | 3.38942592  | -0.09218195 |
| H | -2.17212619 | 2.33552061  | -1.51608571 |
| H | -2.07493338 | 1.45533978  | 1.41542736  |
| H | -3.23471559 | 0.95241485  | 0.15741301  |
| C | -1.47624822 | -1.12234922 | 0.02458796  |
| C | 1.10091502  | 0.39424999  | 0.48863404  |
| O | 0.83198793  | 0.45786087  | 1.67978856  |
| C | -2.79873942 | -1.55385988 | 0.60770031  |
| H | -3.62451886 | -1.24819482 | -0.04469689 |
| H | -2.81115659 | -2.63695901 | 0.70595825  |
| H | -2.95324293 | -1.09512593 | 1.59008668  |
| C | 3.35339635  | -0.32875546 | 0.96062700  |
| H | 3.04502977  | -0.04741107 | 1.96583064  |
| H | 3.45619804  | -1.42008747 | 0.91223711  |
| H | 4.31765967  | 0.13214553  | 0.72709352  |
| N | -1.27055960 | 0.19275745  | -0.06464613 |
| N | 2.34613959  | 0.13142616  | 0.01481714  |
| C | 2.61866142  | -0.12012464 | -1.39511198 |
| H | 2.28249054  | 0.71051411  | -2.02082708 |
| H | 3.70002034  | -0.20326660 | -1.52062168 |
| H | 2.14796996  | -1.04981962 | -1.73570576 |
| S | -0.35065126 | -2.24152406 | -0.47585714 |

### Proline 5, *endo*

|   |             |             |             |
|---|-------------|-------------|-------------|
| C | -0.15593180 | -0.23529515 | 0.91668558  |
| H | 0.05224011  | 0.46635385  | 1.72332089  |
| C | -2.35292496 | -0.93727268 | 0.09347101  |
| H | -2.64565951 | -1.03178154 | -0.95608717 |
| H | -3.25435142 | -0.75380002 | 0.69215164  |
| C | -1.59399672 | -2.17989938 | 0.57897477  |
| H | -1.15562620 | -2.69748830 | -0.27443703 |
| H | -2.25092803 | -2.87295469 | 1.11100871  |
| C | -0.48160741 | -1.62973803 | 1.48451047  |
| H | -0.84761941 | -1.50761664 | 2.50968569  |
| H | 0.39675690  | -2.27867633 | 1.51087515  |
| N | -1.39831557 | 0.15960033  | 0.27219197  |
| C | -1.50730444 | 1.41945032  | -0.21572798 |
| C | -2.77389883 | 1.75216775  | -0.96955345 |
| H | -2.77546350 | 1.22822851  | -1.93122862 |
| H | -3.66654698 | 1.44514784  | -0.41682335 |
| H | -2.79676869 | 2.82670502  | -1.14676267 |
| C | 1.01045174  | -0.25798275 | -0.07943736 |
| N | 2.13461487  | 0.36972320  | 0.28070866  |
| C | 3.29514902  | 0.31455690  | -0.60365756 |
| H | 3.12081665  | 0.91088004  | -1.50595204 |
| H | 4.16459457  | 0.69649115  | -0.06746816 |
| H | 3.47297111  | -0.71582096 | -0.91501374 |
| C | 2.19616162  | 1.31078968  | 1.40620300  |
| H | 3.14363662  | 1.84533099  | 1.34920836  |
| H | 1.38267377  | 2.03666137  | 1.33419108  |
| H | 2.15837437  | 0.79084743  | 2.36859379  |
| S | 0.85440665  | -1.08669829 | -1.51648773 |
| O | -0.60640455 | 2.23719036  | -0.05074388 |

### Proline 5, *exo*

|   |             |             |             |
|---|-------------|-------------|-------------|
| C | 0.18619768  | -0.45155796 | -0.77826706 |
| C | 0.58121197  | -1.93098198 | -0.98277800 |
| C | 2.11355129  | -1.93276658 | -0.89380653 |
| C | 2.40020023  | -0.84273820 | 0.13942128  |
| H | 0.01549473  | 0.03812610  | -1.73813079 |
| H | 0.16052283  | -2.52810598 | -0.17071979 |
| H | 0.20684115  | -2.31832175 | -1.93389753 |
| H | 2.51498444  | -2.90509136 | -0.59819874 |
| H | 2.55854163  | -1.65432811 | -1.85549492 |
| H | 2.27788375  | -1.22283275 | 1.16168558  |
| H | 3.39781279  | -0.41043857 | 0.03443270  |
| C | 1.37238063  | 1.46852753  | 0.12186701  |
| C | -1.03965343 | -0.30548359 | 0.13223410  |
| C | 2.57647895  | 2.00925045  | 0.85942239  |
| H | 3.47998471  | 1.92096051  | 0.24750541  |
| H | 2.39432919  | 3.05978577  | 1.08221182  |
| H | 2.74000234  | 1.45626321  | 1.78934762  |
| C | -3.34946546 | 0.32506840  | 0.42343251  |
| H | -3.50062811 | -0.60068710 | 0.97992144  |
| H | -3.24329781 | 1.13966167  | 1.14833676  |
| H | -4.20569935 | 0.51385304  | -0.22547934 |
| N | 1.36894814  | 0.14503250  | -0.16532195 |
| N | -2.14988184 | 0.21081080  | -0.40066059 |
| C | -2.16520806 | 0.89233220  | -1.70073710 |
| H | -2.03482913 | 0.18582267  | -2.52614813 |
| H | -3.13530326 | 1.37350713  | -1.82002497 |
| H | -1.38739846 | 1.65928376  | -1.72957052 |
| S | -0.93512377 | -0.82869403 | 1.71052124  |
| O | 0.43222222  | 2.18484221  | -0.21020388 |



### Proline 6, *endo*

|   |             |             |             |
|---|-------------|-------------|-------------|
| C | -0.00874320 | 0.38645952  | -0.87061550 |
| H | 0.09516403  | -0.38007198 | -1.63749422 |
| C | -2.03113412 | 1.51531573  | -0.10657551 |
| H | -2.31120491 | 1.65878176  | 0.94013620  |
| H | -2.94043520 | 1.51789941  | -0.71951373 |
| C | -1.02505441 | 2.57201221  | -0.57606872 |
| H | -0.49424201 | 2.97971000  | 0.28523808  |
| H | -1.51649996 | 3.39198857  | -1.10563111 |
| C | -0.05088954 | 1.80050414  | -1.47650997 |
| H | -0.44050868 | 1.73213902  | -2.49796799 |
| H | 0.93961944  | 2.26068935  | -1.51862283 |
| N | -1.32699908 | 0.23497328  | -0.27459894 |
| C | -1.78878003 | -0.95746280 | 0.10877612  |
| C | -3.13977679 | -0.95512443 | 0.77382919  |
| H | -3.06453152 | -0.44608813 | 1.74193622  |
| H | -3.88244784 | -0.42173749 | 0.17116595  |
| H | -3.46792563 | -1.97934619 | 0.93622735  |
| C | 1.10020626  | 0.24477019  | 0.17587772  |
| N | 2.23901979  | -0.32262256 | -0.23398463 |
| C | 3.33941854  | -0.46233213 | 0.71597404  |
| H | 3.04717330  | -1.11770310 | 1.54283736  |
| H | 4.20341878  | -0.87891114 | 0.19783101  |
| H | 3.59332268  | 0.51219936  | 1.13898086  |
| C | 2.36397981  | -0.98544658 | -1.53546101 |
| H | 3.37526470  | -1.37945144 | -1.62617766 |
| H | 1.65372429  | -1.81519781 | -1.61376190 |
| H | 2.20335722  | -0.28220050 | -2.35774507 |
| S | -0.92729521 | -2.36860104 | -0.09264170 |
| S | 0.88929930  | 0.85885476  | 1.70796038  |

### Proline 6, *exo*

|   |             |             |             |
|---|-------------|-------------|-------------|
| C | 0.06052227  | -0.60074220 | -0.72504671 |
| C | 0.22191366  | -2.12099609 | -0.95364126 |
| C | 1.73414511  | -2.36359934 | -0.87152043 |
| C | 2.19236445  | -1.33271451 | 0.15674660  |
| H | -0.06131392 | -0.06156745 | -1.66588116 |
| H | -0.28567428 | -2.66084400 | -0.15032955 |
| H | -0.21030870 | -2.43093795 | -1.90854041 |
| H | 1.98025738  | -3.38546943 | -0.57358548 |
| H | 2.21288928  | -2.16092926 | -1.83569982 |
| H | 1.99646809  | -1.67350864 | 1.18074307  |
| H | 3.24633791  | -1.07128785 | 0.05675131  |
| C | 1.62172805  | 1.10211676  | 0.07927835  |
| C | -1.10608963 | -0.31700923 | 0.22560234  |
| C | 2.93635997  | 1.38107399  | 0.76285271  |
| H | 3.77453849  | 1.08835845  | 0.12048506  |
| H | 3.01162425  | 2.44502705  | 0.97584224  |
| H | 3.00746569  | 0.81373336  | 1.69709830  |
| C | -3.39035427 | 0.37030797  | 0.55086788  |
| H | -3.57722504 | -0.49496223 | 1.18984838  |
| H | -3.18169883 | 1.22708581  | 1.20016573  |
| H | -4.26632267 | 0.57451785  | -0.06522219 |
| N | 1.33579500  | -0.18167424 | -0.14641422 |
| N | -2.24934138 | 0.10416421  | -0.32063689 |
| C | -2.35309702 | 0.50175220  | -1.72702089 |
| H | -2.13374628 | -0.33704058 | -2.39401143 |
| H | -3.37550977 | 0.82405149  | -1.91964562 |
| H | -1.67438183 | 1.33417129  | -1.93915758 |
| S | 0.59770969  | 2.34162374  | -0.35162332 |
| S | -0.92805568 | -0.64870116 | 1.84689497  |

## Set M06-2X/6-311+G(2d,p)

### Proline 1, *endo*

|   |             |             |             |
|---|-------------|-------------|-------------|
| C | 0.04904241  | 0.02001494  | 0.00206103  |
| H | 1.13148394  | -0.09268045 | -0.00197780 |
| C | -1.44279374 | 1.93865455  | 0.06353648  |
| H | -2.27013400 | 2.15295061  | -0.61302151 |
| H | -1.08965189 | 2.88142448  | 0.49217779  |
| C | -1.83996661 | 0.93922876  | 1.15477535  |
| H | -2.60745565 | 0.26856764  | 0.76874468  |
| H | -2.22147361 | 1.43151983  | 2.04777818  |
| C | -0.54874248 | 0.15487842  | 1.40878318  |
| H | 0.13858834  | 0.73309100  | 2.02878615  |
| H | -0.71150936 | -0.81051864 | 1.88620480  |
| N | -0.35284148 | 1.25726522  | -0.63931120 |
| C | 0.04448648  | 1.47139022  | -1.92336436 |
| O | 0.81331736  | 0.70205459  | -2.47076422 |
| C | -0.51677957 | 2.69154413  | -2.61108973 |
| H | -1.55051902 | 2.49539590  | -2.90461717 |
| H | -0.50930114 | 3.56594684  | -1.95966583 |
| H | 0.07196748  | 2.88341651  | -3.50349812 |
| C | -0.56421413 | -1.16935135 | -0.72496659 |
| O | 0.20882604  | -2.25201448 | -0.62755934 |
| C | -0.29449078 | -3.41483388 | -1.28742061 |
| H | -0.44065013 | -3.20479511 | -2.34566329 |
| H | 0.45943212  | -4.18357352 | -1.14764473 |
| H | -1.24345794 | -3.71915117 | -0.84818744 |
| O | -1.63651393 | -1.15386777 | -1.26583047 |

### Proline 1, *exo*

|   |             |             |             |
|---|-------------|-------------|-------------|
| C | -0.02148377 | -0.00323067 | 0.05990996  |
| C | 1.51638643  | -0.03435839 | 0.13838963  |
| C | 1.91915022  | 1.43418556  | -0.02408983 |
| C | 0.82198184  | 2.16735875  | 0.74429964  |
| H | -0.39568768 | -0.21679565 | -0.94262018 |
| H | 1.81438426  | -0.38678159 | 1.12802991  |
| H | 1.95056947  | -0.69374725 | -0.61036581 |
| H | 2.91488421  | 1.64544940  | 0.36275859  |
| H | 1.88633208  | 1.72349182  | -1.07620430 |
| H | 1.03291441  | 2.17317260  | 1.81929065  |
| H | 0.68284569  | 3.19456792  | 0.40929254  |
| C | -1.65723380 | 1.70199672  | 0.62269269  |
| C | -0.62908501 | -1.00469418 | 1.02807350  |
| O | -2.54991605 | 0.90489941  | 0.39635586  |
| O | -0.65826395 | -0.85426455 | 2.21764947  |
| C | -1.92311184 | 3.11291700  | 1.09008405  |
| H | -1.60096938 | 3.83265673  | 0.33525170  |
| H | -2.99109620 | 3.21878419  | 1.25568843  |
| H | -1.38193626 | 3.32651918  | 2.01297507  |
| N | -0.35438715 | 1.35674100  | 0.45126797  |
| O | -1.05381177 | -2.09933333 | 0.39604140  |
| H | -2.52585569 | -2.66181255 | 1.73328445  |
| H | -1.93665356 | -3.90226534 | 0.58562713  |
| H | -0.94022236 | -3.42067915 | 1.99270511  |
| C | -1.65180260 | -3.08427059 | 1.24032876  |

### Proline 2, *endo*

|   |             |             |             |
|---|-------------|-------------|-------------|
| C | 0.02136743  | 0.00006784  | -0.05398604 |
| H | 1.10552211  | -0.08783833 | -0.08587584 |
| C | -1.47355998 | 1.91230560  | 0.01497669  |
| H | -2.31266130 | 2.14036192  | -0.64099883 |
| H | -1.08575991 | 2.84970311  | 0.42516698  |
| C | -1.84727226 | 0.92699106  | 1.12177769  |
| H | -2.61466420 | 0.24428455  | 0.75709710  |
| H | -2.21905891 | 1.43070305  | 2.01244373  |
| C | -0.54408847 | 0.16215924  | 1.36339410  |
| H | 0.15084938  | 0.75973371  | 1.95597801  |
| H | -0.68470482 | -0.79533016 | 1.86270518  |
| N | -0.41461448 | 1.21267271  | -0.72810286 |
| C | 0.03797848  | 1.55125360  | -1.94108877 |
| S | 1.13315787  | 0.62703229  | -2.77868002 |
| C | -0.52857946 | 2.82165303  | -2.51438152 |
| H | -1.56842375 | 2.65461032  | -2.80870248 |
| H | -0.51402367 | 3.63174107  | -1.78221834 |
| H | 0.03975175  | 3.10794113  | -3.39278536 |
| C | -0.58892191 | -1.22040734 | -0.73006655 |
| O | 0.18632222  | -2.29363475 | -0.57735172 |
| C | -0.30210532 | -3.48437739 | -1.19756124 |
| H | -0.44609743 | -3.31098538 | -2.26275969 |
| H | 0.46033241  | -4.23900302 | -1.02986082 |
| H | -1.24856968 | -3.78382374 | -0.74981100 |
| O | -1.66552741 | -1.23125681 | -1.26104318 |

### Proline 2, *exo*

|   |             |             |             |
|---|-------------|-------------|-------------|
| C | -0.06071980 | 0.00161492  | 0.06479346  |
| C | 1.47872853  | -0.04222267 | 0.11053338  |
| C | 1.89107663  | 1.42687570  | 0.00176160  |
| C | 0.80715216  | 2.13588641  | 0.80540186  |
| H | -0.46578164 | -0.19196707 | -0.92946576 |
| H | 1.80003568  | -0.44133489 | 1.07470101  |
| H | 1.88766694  | -0.67111332 | -0.67731579 |
| H | 2.88989793  | 1.61709519  | 0.39150451  |
| H | 1.85419597  | 1.75900617  | -1.03725999 |
| H | 1.00867364  | 2.07740883  | 1.88023135  |
| H | 0.68230248  | 3.17972195  | 0.52671041  |
| C | -1.65667732 | 1.78730355  | 0.57024777  |
| C | -0.64206395 | -1.01089983 | 1.03932490  |
| S | -2.95248263 | 0.83346487  | 0.16254448  |
| O | -0.68979592 | -0.84125042 | 2.22565497  |
| C | -1.83945649 | 3.19966660  | 1.06005517  |
| H | -1.44664515 | 3.90987785  | 0.32797628  |
| H | -2.89664197 | 3.39414918  | 1.20379501  |
| H | -1.30750028 | 3.35539101  | 2.00117557  |
| N | -0.39247920 | 1.35881549  | 0.48212764  |
| O | -0.98833689 | -2.13833893 | 0.42016182  |
| H | -2.48356118 | -2.74628509 | 1.70768696  |
| H | -1.77427883 | -3.98369636 | 0.62620088  |
| H | -0.87015780 | -3.40541452 | 2.06041089  |
| C | -1.56521937 | -3.13324758 | 1.26775805  |

### Proline 3, *endo*

|   |             |             |             |
|---|-------------|-------------|-------------|
| C | 0.07150996  | 0.43476094  | 0.79431581  |
| H | -0.20740105 | -0.13158845 | 1.67846407  |
| C | 2.23529118  | 0.95413702  | -0.20634145 |
| H | 2.45371523  | 0.84353137  | -1.26919607 |
| H | 3.17456647  | 0.89551196  | 0.35057880  |
| C | 1.48873275  | 2.26486469  | 0.07793824  |
| H | 0.99395503  | 2.60648306  | -0.82762116 |
| H | 2.16338840  | 3.04430001  | 0.42952701  |
| C | 0.43986187  | 1.88658988  | 1.13129285  |
| H | 0.87578760  | 1.91019949  | 2.13180112  |
| H | -0.42735233 | 2.54584833  | 1.11846147  |
| N | 1.31513684  | -0.08995295 | 0.24980619  |
| C | 1.42896277  | -1.41734078 | 0.00630460  |
| O | 0.55131177  | -2.20147067 | 0.33599673  |
| C | 2.68771467  | -1.86434818 | -0.69729810 |
| H | 2.66257363  | -1.52944320 | -1.73630017 |
| H | 3.57941292  | -1.44335213 | -0.23185743 |
| H | 2.72837763  | -2.94935638 | -0.67058243 |
| C | -1.01617153 | 0.39802368  | -0.28656191 |
| N | -2.20768687 | -0.16715915 | 0.01781376  |
| C | -3.27936143 | -0.10119653 | -0.96146382 |
| H | -3.40459005 | -1.06476047 | -1.46251601 |
| H | -4.21320523 | 0.15911502  | -0.46023406 |
| H | -3.03606897 | 0.65403598  | -1.70225825 |
| C | -2.43163676 | -1.02051011 | 1.17928538  |
| H | -3.29394908 | -1.65054980 | 0.96626529  |
| H | -1.57597438 | -1.67211756 | 1.34745178  |
| H | -2.65191174 | -0.43800837 | 2.07723781  |
| O | -0.79078927 | 0.93485329  | -1.36091003 |

### Proline 3, *exo*

|   |             |             |             |
|---|-------------|-------------|-------------|
| C | 0.10689773  | -0.69281636 | -0.54317139 |
| C | 0.58374115  | -2.14668552 | -0.37500290 |
| C | 2.11117149  | -2.04949705 | -0.43837158 |
| C | 2.38930221  | -0.73566362 | 0.28711506  |
| H | -0.14070403 | -0.46322313 | -1.57807173 |
| H | 0.27915886  | -2.50064667 | 0.61045530  |
| H | 0.16078602  | -2.80532506 | -1.13194658 |
| H | 2.60845906  | -2.89802218 | 0.02889997  |
| H | 2.45039486  | -1.97526413 | -1.47358447 |
| H | 2.36467551  | -0.87561179 | 1.37303922  |
| H | 3.34231557  | -0.28758158 | 0.00814507  |
| C | 1.16058310  | 1.43960381  | -0.04637937 |
| C | -1.05472223 | -0.39387477 | 0.41527743  |
| O | 0.13073519  | 2.01076218  | -0.37445155 |
| O | -0.85869283 | -0.51002379 | 1.61215742  |
| C | 2.36834103  | 2.18093276  | 0.47441413  |
| H | 3.21148024  | 2.06787568  | -0.20957721 |
| H | 2.11094167  | 3.23250822  | 0.56016142  |
| H | 2.66955033  | 1.79253444  | 1.44854722  |
| C | -3.32674285 | 0.28274788  | 0.80749695  |
| H | -3.13976571 | -0.19062917 | 1.76628354  |
| H | -3.36197493 | 1.36688933  | 0.95071287  |
| H | -4.28211350 | -0.05665871 | 0.40699321  |
| N | 1.27258822  | 0.09518721  | -0.14872426 |
| N | -2.26261871 | -0.07939582 | -0.11506754 |
| C | -2.42046385 | 0.36920614  | -1.49482038 |
| H | -2.20538513 | -0.43148387 | -2.20299772 |
| H | -3.45989724 | 0.65880247  | -1.63544974 |
| H | -1.78074123 | 1.22935312  | -1.70098240 |

### Proline 4, *endo*

|   |             |             |             |
|---|-------------|-------------|-------------|
| C | 0.07860627  | 0.59378251  | -0.73623926 |
| H | 0.26770606  | -0.04589848 | -1.59370220 |
| C | -2.00579364 | 1.51111747  | 0.11869081  |
| H | -2.38324640 | 1.45414084  | 1.13877984  |
| H | -2.85463452 | 1.61540115  | -0.56375153 |
| C | -0.99237762 | 2.64171508  | -0.06186255 |
| H | -0.47782078 | 2.82043747  | 0.88044617  |
| H | -1.46693898 | 3.56543958  | -0.38965980 |
| C | -0.00732035 | 2.08320813  | -1.09479429 |
| H | -0.40803352 | 2.18728005  | -2.10514319 |
| H | 0.96719069  | 2.56970150  | -1.05847489 |
| N | -1.24931299 | 0.29696282  | -0.21561132 |
| C | -1.63224912 | -0.94890357 | 0.05938815  |
| C | -2.99858063 | -1.09374794 | 0.67149942  |
| H | -2.97317424 | -0.72597378 | 1.70065188  |
| H | -3.74342880 | -0.51065540 | 0.12570698  |
| H | -3.28408674 | -2.14015168 | 0.68036443  |
| C | 1.10044863  | 0.36478379  | 0.38757415  |
| N | 2.32401143  | -0.10347244 | 0.03895772  |
| C | 3.25669623  | -0.45251986 | 1.09803728  |
| H | 3.29033504  | -1.53776866 | 1.23022359  |
| H | 4.25518833  | -0.09425090 | 0.84407437  |
| H | 2.92458007  | 0.00785623  | 2.02316068  |
| C | 2.61797614  | -0.63665132 | -1.28325060 |
| H | 3.68445123  | -0.85039441 | -1.32945040 |
| H | 2.06277186  | -1.55878484 | -1.47628462 |
| H | 2.39678372  | 0.09221882  | -2.06264950 |
| O | 0.80059945  | 0.68194778  | 1.52544760  |
| S | -0.66534682 | -2.27491996 | -0.22832893 |

### Proline 4, *exo*

|   |             |             |             |
|---|-------------|-------------|-------------|
| C | 0.00564439  | 0.76514840  | -0.52120072 |
| C | -0.23642176 | 2.28633078  | -0.51502575 |
| C | -1.76096781 | 2.42551182  | -0.52551294 |
| C | -2.20679338 | 1.24623382  | 0.33045971  |
| H | 0.20961043  | 0.37088504  | -1.51496969 |
| H | 0.16319087  | 2.70511933  | 0.40978901  |
| H | 0.24773209  | 2.77774700  | -1.35736141 |
| H | -2.10323790 | 3.38065646  | -0.13052787 |
| H | -2.15087521 | 2.30777393  | -1.53859818 |
| H | -2.09022965 | 1.46219140  | 1.39732408  |
| H | -3.23170713 | 0.93912955  | 0.13543150  |
| C | -1.45345304 | -1.11470632 | 0.04171622  |
| C | 1.10477488  | 0.40693125  | 0.49060007  |
| O | 0.83882548  | 0.47124012  | 1.67689286  |
| C | -2.77644853 | -1.54826358 | 0.61598951  |
| H | -3.59167688 | -1.27647355 | -0.05930869 |
| H | -2.77473586 | -2.62471869 | 0.74809098  |
| H | -2.95538047 | -1.06077103 | 1.57694675  |
| C | 3.34287437  | -0.35356658 | 0.94766800  |
| H | 3.04282797  | -0.08364583 | 1.95509298  |
| H | 3.42343318  | -1.44253024 | 0.87829299  |
| H | 4.31209867  | 0.09110825  | 0.71940926  |
| N | -1.26175835 | 0.19916387  | -0.06200752 |
| N | 2.34466804  | 0.13776414  | 0.01131854  |
| C | 2.60716452  | -0.11587065 | -1.39759574 |
| H | 2.28726892  | 0.72141555  | -2.01737051 |
| H | 3.68297391  | -0.22246325 | -1.52457925 |
| H | 2.11557889  | -1.03244761 | -1.73514219 |
| S | -0.31438062 | -2.23099338 | -0.43762200 |

### Proline 5, *endo*

|   |             |             |             |
|---|-------------|-------------|-------------|
| C | -0.15912703 | -0.23899326 | 0.94243942  |
| H | 0.05538253  | 0.45066617  | 1.75386746  |
| C | -2.34786853 | -0.92985315 | 0.09826081  |
| H | -2.60671827 | -1.01294642 | -0.95816539 |
| H | -3.26360312 | -0.75556455 | 0.67005480  |
| C | -1.60105341 | -2.17730070 | 0.58806718  |
| H | -1.17316964 | -2.70355431 | -0.26082220 |
| H | -2.26253632 | -2.85649171 | 1.12470147  |
| C | -0.48178772 | -1.63910226 | 1.49138179  |
| H | -0.83863999 | -1.53294311 | 2.51742672  |
| H | 0.39470241  | -2.28558822 | 1.49828132  |
| N | -1.40489349 | 0.16699922  | 0.31562101  |
| C | -1.48316642 | 1.41408405  | -0.20646037 |
| C | -2.73181001 | 1.74144556  | -0.98557564 |
| H | -2.70983165 | 1.20708806  | -1.93812271 |
| H | -3.63185871 | 1.43746284  | -0.44987595 |
| H | -2.75102869 | 2.81086981  | -1.17443091 |
| C | 0.99248497  | -0.24727322 | -0.06932170 |
| N | 2.12021108  | 0.37480379  | 0.28279351  |
| C | 3.26141059  | 0.33672540  | -0.62451589 |
| H | 3.04075344  | 0.89816585  | -1.53513740 |
| H | 4.12496412  | 0.76398151  | -0.12222247 |
| H | 3.46924433  | -0.69243903 | -0.91132990 |
| C | 2.19296353  | 1.30189018  | 1.41711939  |
| H | 3.14250889  | 1.82613214  | 1.36668123  |
| H | 1.38575353  | 2.03141841  | 1.35177162  |
| H | 2.14905234  | 0.77187067  | 2.36974104  |
| S | 0.81086571  | -1.05305827 | -1.51818415 |
| O | -0.57370446 | 2.21660454  | -0.05164410 |

### Proline 5, *exo*

|   |             |             |             |
|---|-------------|-------------|-------------|
| C | 0.18391875  | -0.45600243 | -0.77376418 |
| C | 0.58398080  | -1.93361074 | -0.97242572 |
| C | 2.11512062  | -1.92406890 | -0.89344443 |
| C | 2.39335397  | -0.84070146 | 0.14629165  |
| H | 0.01854298  | 0.02917618  | -1.73346574 |
| H | 0.17593148  | -2.52566262 | -0.15451930 |
| H | 0.20590583  | -2.32694047 | -1.91531865 |
| H | 2.52477333  | -2.89212334 | -0.60884100 |
| H | 2.54929360  | -1.63086749 | -1.85149106 |
| H | 2.26196236  | -1.22740307 | 1.16198027  |
| H | 3.38668665  | -0.40455535 | 0.05174875  |
| C | 1.36686339  | 1.46690694  | 0.11502794  |
| C | -1.04221057 | -0.30367159 | 0.13399768  |
| C | 2.57149101  | 2.00554368  | 0.84765021  |
| H | 3.46442288  | 1.93471389  | 0.22368737  |
| H | 2.38220463  | 3.04778661  | 1.08727125  |
| H | 2.75060493  | 1.43902296  | 1.76248989  |
| C | -3.34640002 | 0.32664528  | 0.42242646  |
| H | -3.52992776 | -0.62352970 | 0.92030902  |
| H | -3.21577892 | 1.08792767  | 1.19489745  |
| H | -4.18889604 | 0.58123868  | -0.21517194 |
| N | 1.36312269  | 0.14312125  | -0.16071180 |
| N | -2.14534327 | 0.22342201  | -0.39817380 |
| C | -2.15814492 | 0.89384245  | -1.70189024 |
| H | -2.02966148 | 0.18009156  | -2.51708208 |
| H | -3.12256981 | 1.37734507  | -1.82535617 |
| H | -1.37621850 | 1.65208580  | -1.73573993 |
| S | -0.94476392 | -0.82900042 | 1.71285755  |
| O | 0.43283531  | 2.18036755  | -0.22233944 |

### Proline 6, *endo*

|   |             |             |             |   |             |             |             |
|---|-------------|-------------|-------------|---|-------------|-------------|-------------|
| C | -0.00909093 | 0.38883452  | -0.88878717 | H | 1.98811273  | -1.66495988 | 1.16560325  |
| H | 0.10036866  | -0.37213398 | -1.65580872 | H | 3.24175624  | -1.06281746 | 0.05141046  |
| C | -2.02095143 | 1.50884751  | -0.09897208 | C | 1.60611834  | 1.10092388  | 0.07838547  |
| H | -2.26755596 | 1.63878360  | 0.95509363  | C | -1.10007828 | -0.31982627 | 0.21887781  |
| H | -2.94342758 | 1.51963724  | -0.68494099 | C | 2.90899455  | 1.37503989  | 0.78017792  |
| C | -1.02682954 | 2.56956410  | -0.58232728 | H | 3.75527470  | 1.09997114  | 0.14589690  |
| H | -0.49382678 | 2.98427763  | 0.26977271  | H | 2.97493334  | 2.43134245  | 1.01668379  |
| H | -1.52755454 | 3.37941063  | -1.11092982 | H | 2.96835415  | 0.78753386  | 1.69972506  |
| C | -0.05476714 | 1.80325843  | -1.48769043 | C | -3.36344586 | 0.40972703  | 0.56180073  |
| H | -0.44831795 | 1.73637875  | -2.50368889 | H | -3.60288356 | -0.46265622 | 1.16856521  |
| H | 0.93216727  | 2.26292993  | -1.53072213 | H | -3.09668751 | 1.22328996  | 1.23938741  |
| N | -1.32658362 | 0.22953278  | -0.29875108 | H | -4.22232822 | 0.69128921  | -0.04079489 |
| C | -1.77873934 | -0.96272306 | 0.09225370  | N | 1.33403037  | -0.18086801 | -0.16538830 |
| C | -3.11711170 | -0.95487372 | 0.77758223  | N | -2.24170304 | 0.10828167  | -0.32006854 |
| H | -3.01106473 | -0.47130668 | 1.75306017  | C | -2.35909272 | 0.47102401  | -1.73221397 |
| H | -3.85778939 | -0.39294630 | 0.20510774  | H | -2.09825166 | -0.36973444 | -2.37551603 |
| H | -3.45978322 | -1.97355627 | 0.92312771  | H | -3.39162911 | 0.73768851  | -1.93598838 |
| C | 1.09073486  | 0.24739296  | 0.16693977  | H | -1.71607368 | 1.32436129  | -1.96104000 |
| N | 2.22818516  | -0.32735746 | -0.22936709 | S | 0.57636733  | 2.34001120  | -0.34285832 |
| C | 3.31653963  | -0.46975781 | 0.73082102  | S | -0.91083909 | -0.64080499 | 1.84147568  |
| H | 2.99045225  | -1.07342180 | 1.57981226  |   |             |             |             |
| H | 4.16254313  | -0.94172884 | 0.23952564  |   |             |             |             |
| H | 3.60507139  | 0.50897734  | 1.11346027  |   |             |             |             |
| C | 2.36389617  | -0.97801275 | -1.53333719 |   |             |             |             |
| H | 3.37551485  | -1.36100859 | -1.62539256 |   |             |             |             |
| H | 1.65993512  | -1.80915218 | -1.61866123 |   |             |             |             |
| H | 2.19691490  | -0.26968206 | -2.34552206 |   |             |             |             |
| S | -0.91849579 | -2.37469044 | -0.11373944 |   |             |             |             |
| S | 0.86606624  | 0.86852650  | 1.69548129  |   |             |             |             |

### Proline 6, *exo*

|   |             |             |             |
|---|-------------|-------------|-------------|
| C | 0.06009705  | -0.60852436 | -0.73815176 |
| C | 0.22834706  | -2.12733419 | -0.95886694 |
| C | 1.74074868  | -2.36012680 | -0.88167345 |
| C | 2.19123665  | -1.32702735 | 0.14477177  |
| H | -0.06577078 | -0.07401016 | -1.67757925 |
| H | -0.27021428 | -2.66304238 | -0.15157974 |
| H | -0.20478739 | -2.44366940 | -1.90711028 |
| H | 1.99279429  | -3.37712888 | -0.58552866 |
| H | 2.21361970  | -2.15195332 | -1.84320293 |

**Table S1.** Energy gap (Hartree) and overlap integrals between the  $n$  and  $\pi^*$  orbitals.

| Com-<br>pound | B3LYP       |                    | B3LYP-D3    |                    | M06-2X      |                    | WB97X-D4    |                    | Wb97X-V     |                    |             |
|---------------|-------------|--------------------|-------------|--------------------|-------------|--------------------|-------------|--------------------|-------------|--------------------|-------------|
|               | $E_j - E_i$ | Orbital<br>Overlap |             |
| <b>Endo</b>   | 1           | 0.25               | 0.0716260   | 0.25               | 0.079814417 | 0.38               | 0.09333792  | 0.44               | 0.0849891   | 0.44               | 0.084989155 |
|               | 2           | 0.19               | 0.0951706   | 0.19               | 0.108083632 | 0.30               | 0.11464861  | 0.37               | 0.1091156   | 0.37               | 0.109115583 |
|               | 3           | 0.30               | 0.0608885   | 0.28               | 0.059112956 | 0.48               | 0.07403054  | 0.55               | 0.1035855   | 0.54               | 0.10358516  |
|               | 4           | 0.23               | 0.0929806   | 0.24               | 0.111600343 | 0.34               | 0.12211548  | 0.47               | 0.1158169   | 0.45               | 0.115816915 |
|               | 5           | 0.20               | 0.0669084   | 0.20               | 0.082894732 | 0.30               | 0.09877218  | 0.36               | 0.0947762   | 0.36               | 0.094776247 |
|               | 6           | 0.14               | 0.0926631   | 0.15               | 0.10611385  | 0.22               | 0.11099934  | 0.29               | 0.1130633   | 0.29               | 0.113063267 |
| <b>Exo</b>    | 1           | 0.26               | 0.1019014   | 0.26               | 0.110525689 | 0.38               | 0.11831056  | 0.44               | 0.1191303   | 0.44               | 0.11913026  |
|               | 2           | 0.20               | 0.1248155   | 0.20               | 0.137930875 | 0.30               | 0.14451327  | 0.37               | 0.1383152   | 0.38               | 0.138315211 |
|               | 3           | 0.34               | 0.0938591   | 0.33               | 0.108098041 | 0.51               | 0.12196114  | 0.62               | 0.1177023   | 0.60               | 0.117702274 |
|               | 4           | 0.33               | 0.1182367   | 0.33               | 0.131918668 | 0.47               | 0.14121346  | 0.63               | 0.1342440   | 0.61               | 0.134244044 |
|               | 5           | 0.20               | 0.0848112   | 0.20               | 0.095470172 | 0.30               | 0.10461177  | 0.36               | 0.1068199   | 0.36               | 0.106819906 |
|               | 6           | 0.14               | 0.1092094   | 0.15               | 0.124763945 | 0.29               | 0.13578751  | 0.29               | 0.1316176   | 0.29               | 0.131617784 |



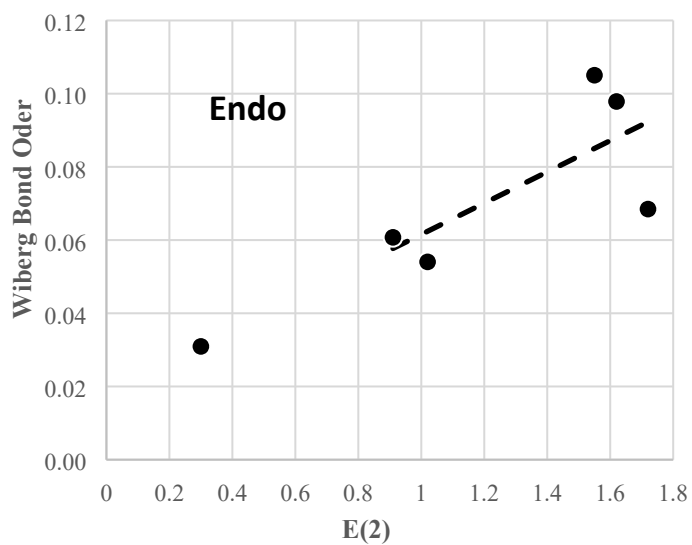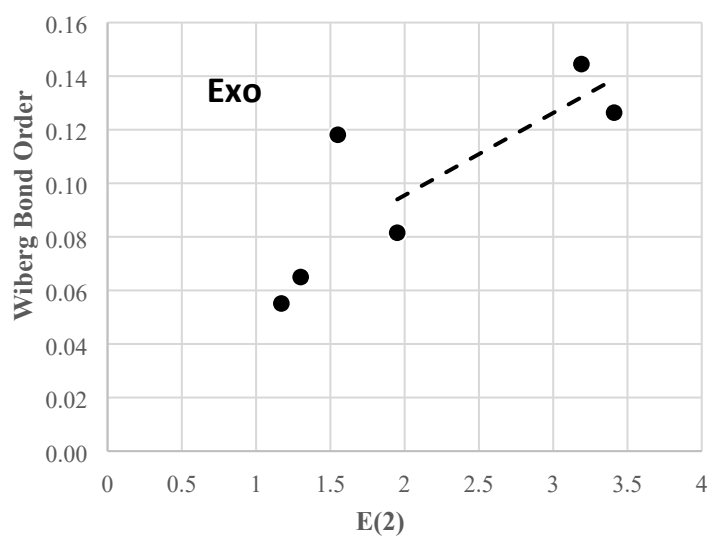

**Figure S1.** Correlation between  $E(2)$  and the WBI in endo and exo pucker.
